# Supplementary material for: Design, synthesis, in vitro potent antiproliferative activity, and kinase inhibitory effects of new triarylpyrazole derivatives possessing different heterocycle terminal moieties
Source: PubMed Central journal article supplement (PMC6720312; doi:10.1080/14756366.2019.1653292), 2019-08-27

## Supplementary Materials

|                                                                              |       |
|------------------------------------------------------------------------------|-------|
| NCI data (Single dose test mode) .....                                       | 2-9   |
| NCI data( Five dose test mode) .....                                         | 10-13 |
| Representative <sup>1</sup> H NMR, <sup>13</sup> C NMR, and MS spectra ..... | 14-37 |

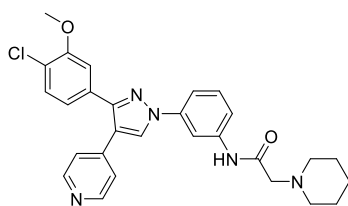

Compound 1a

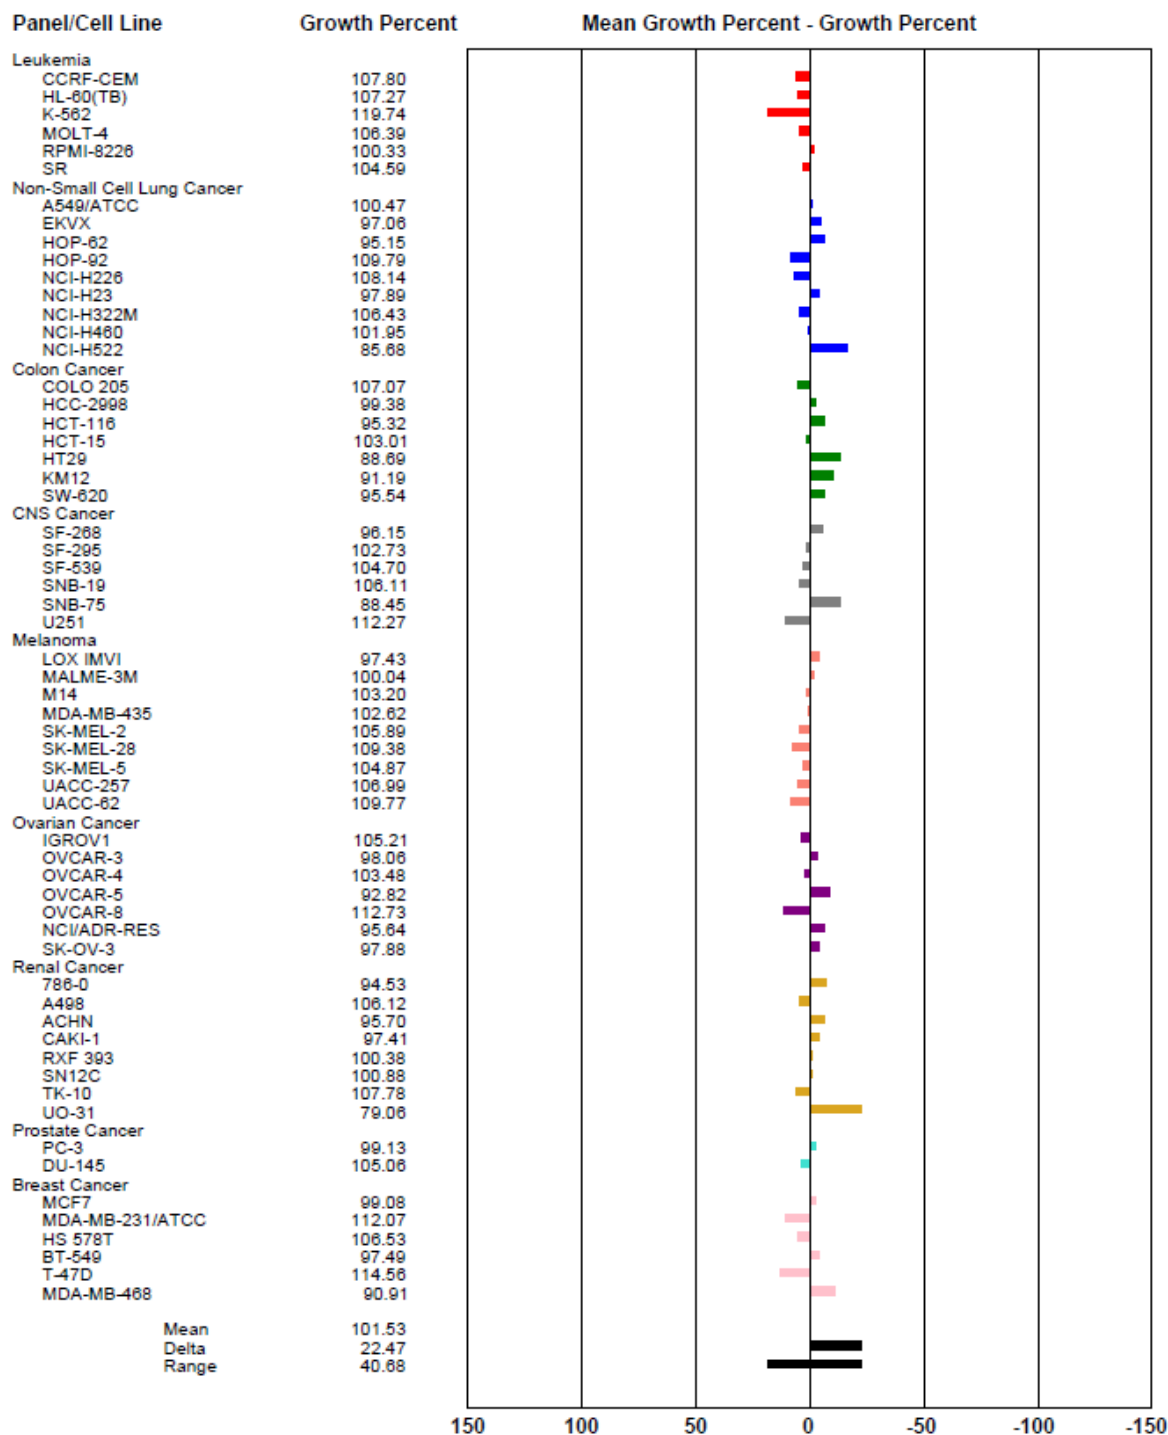

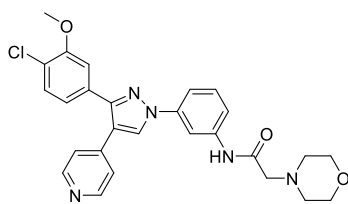

Compound 1b

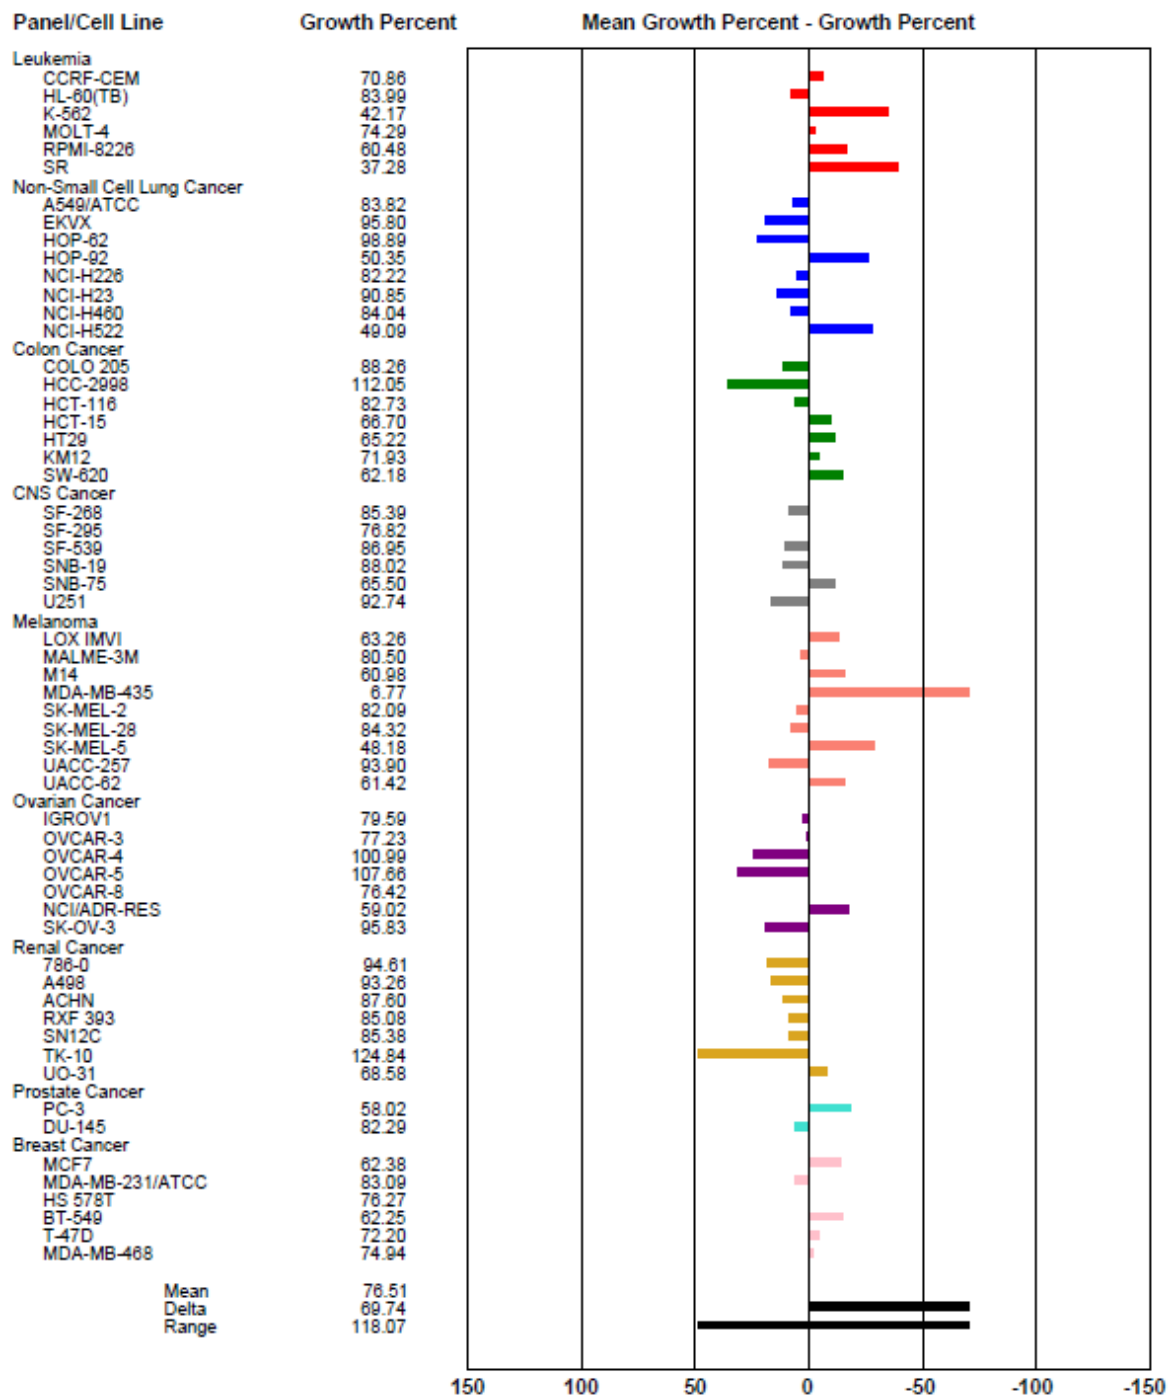

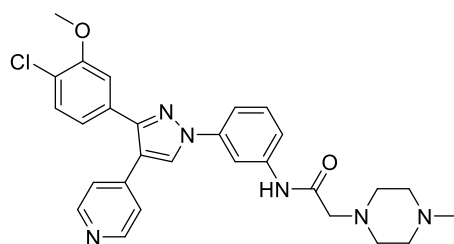

Compound 1c

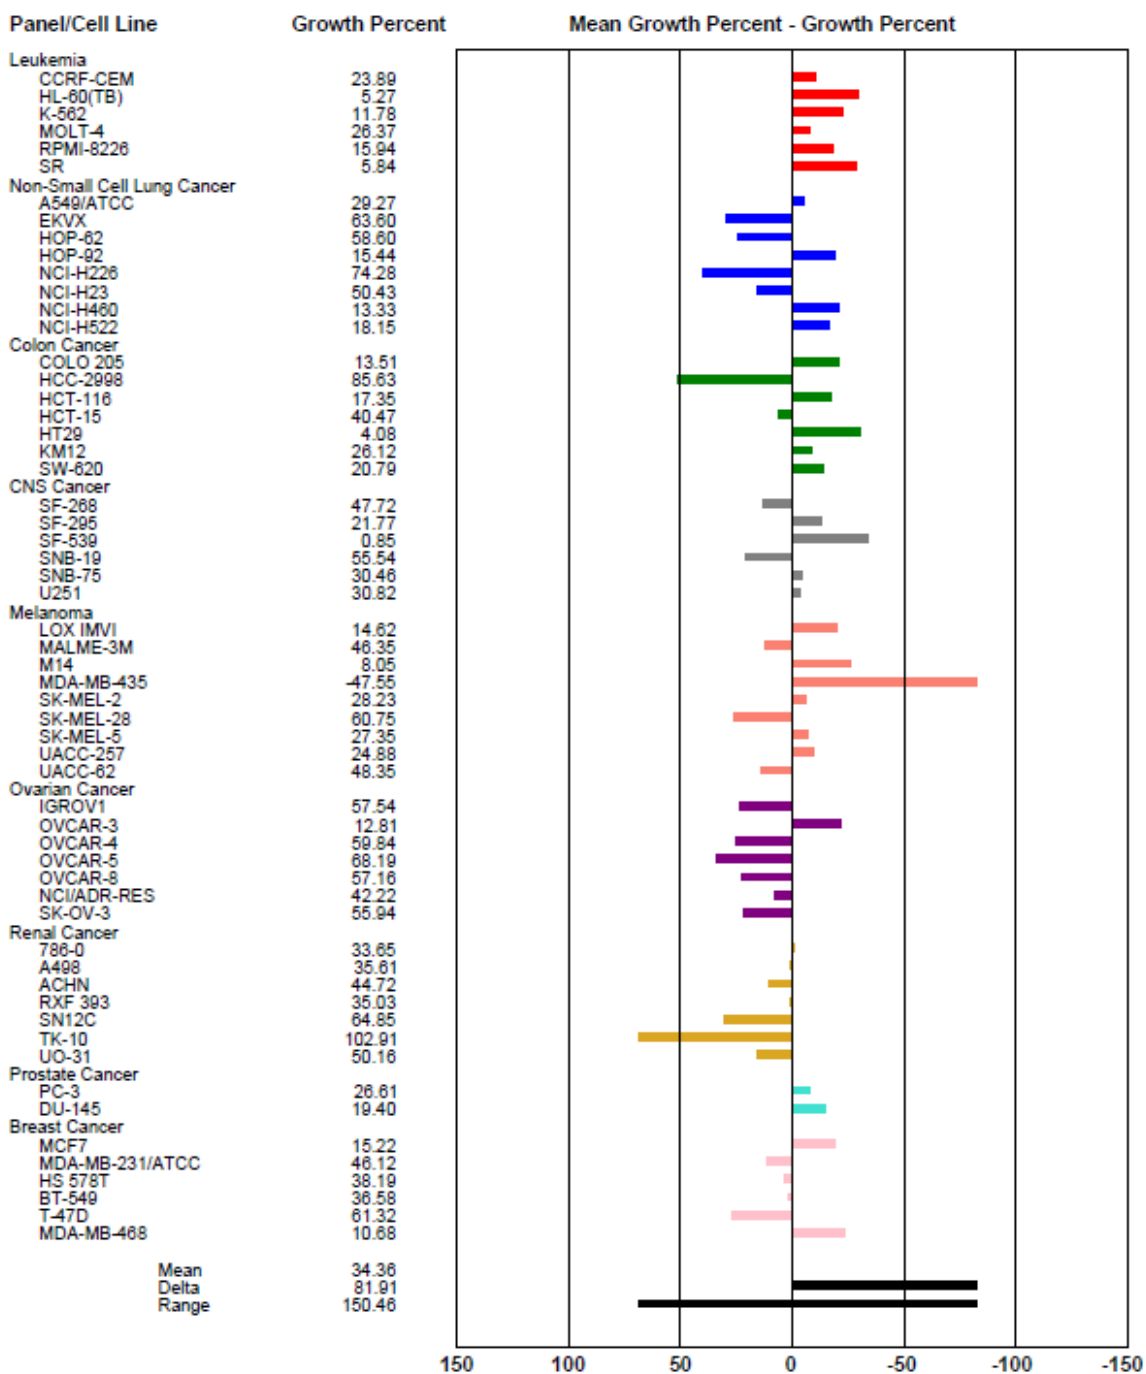

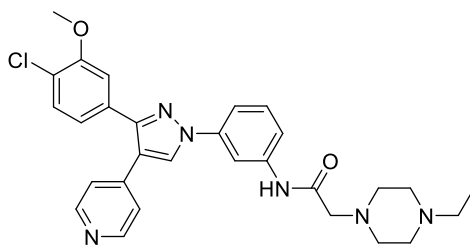

**Compound 1d**

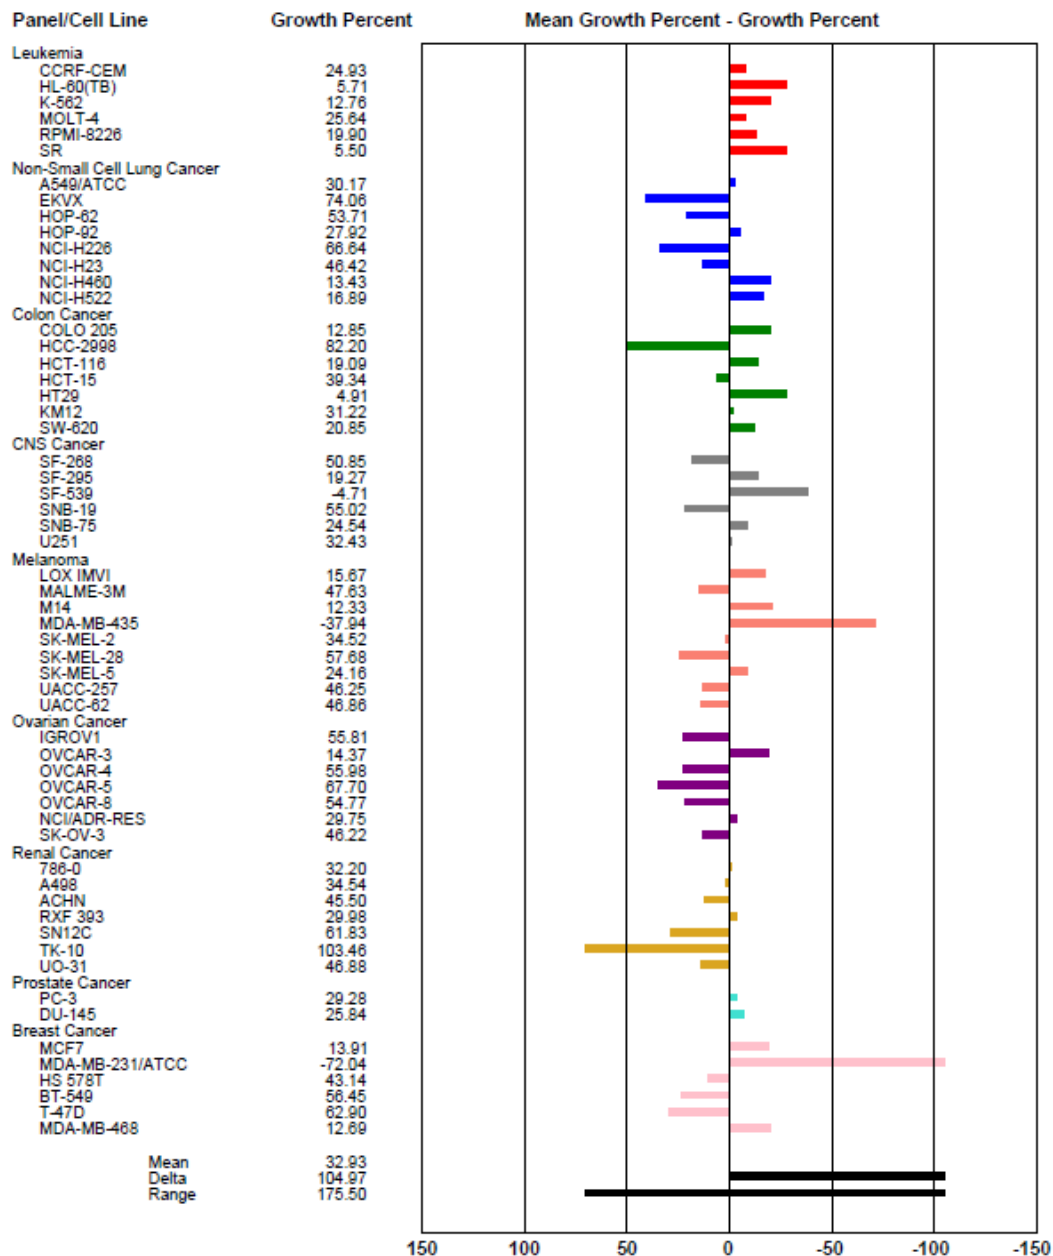

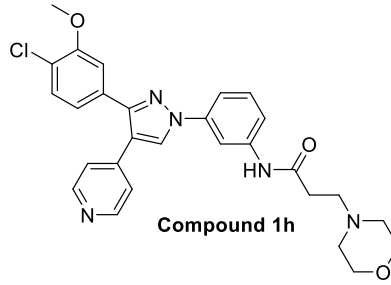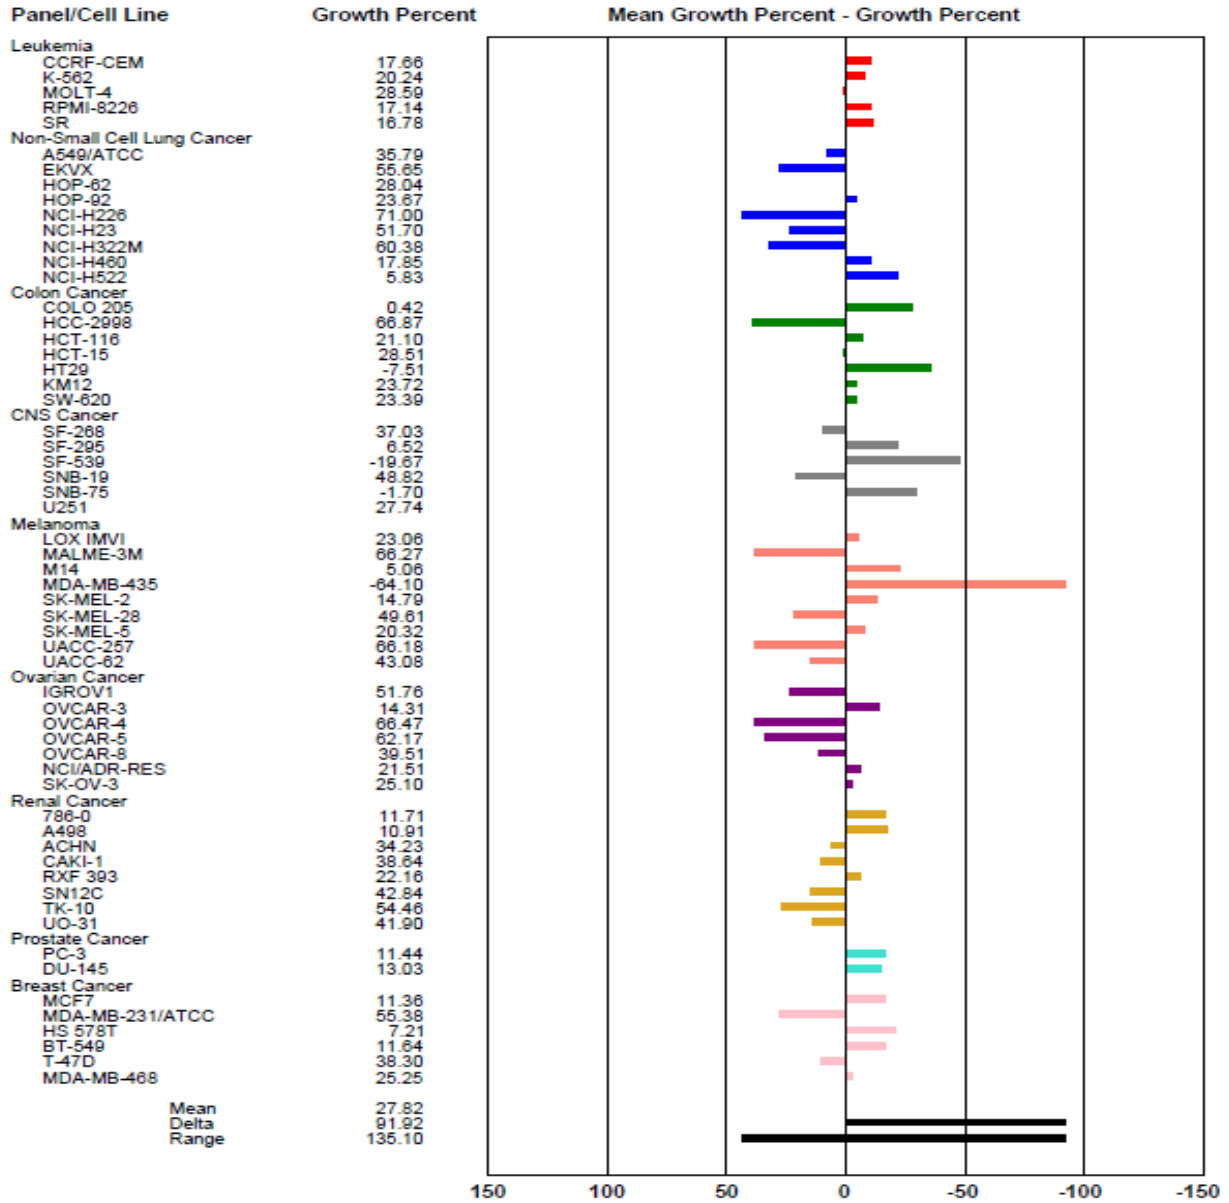

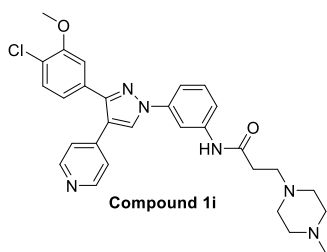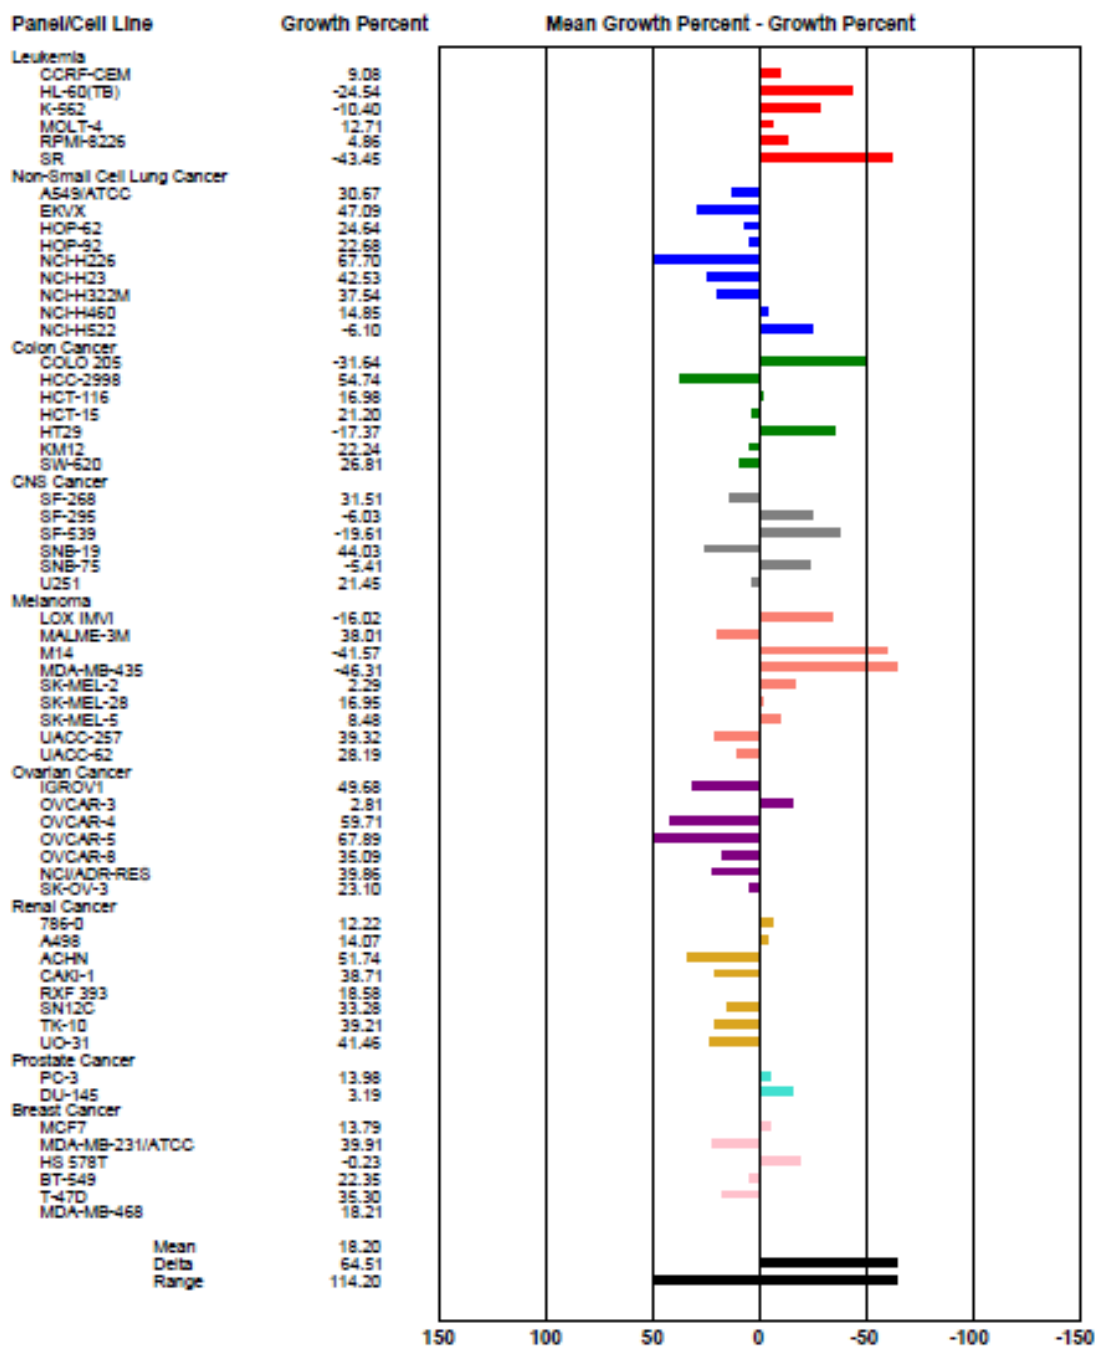

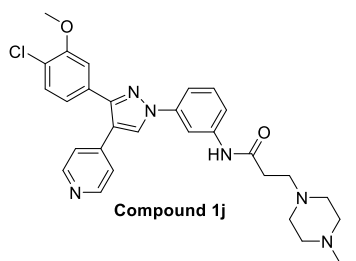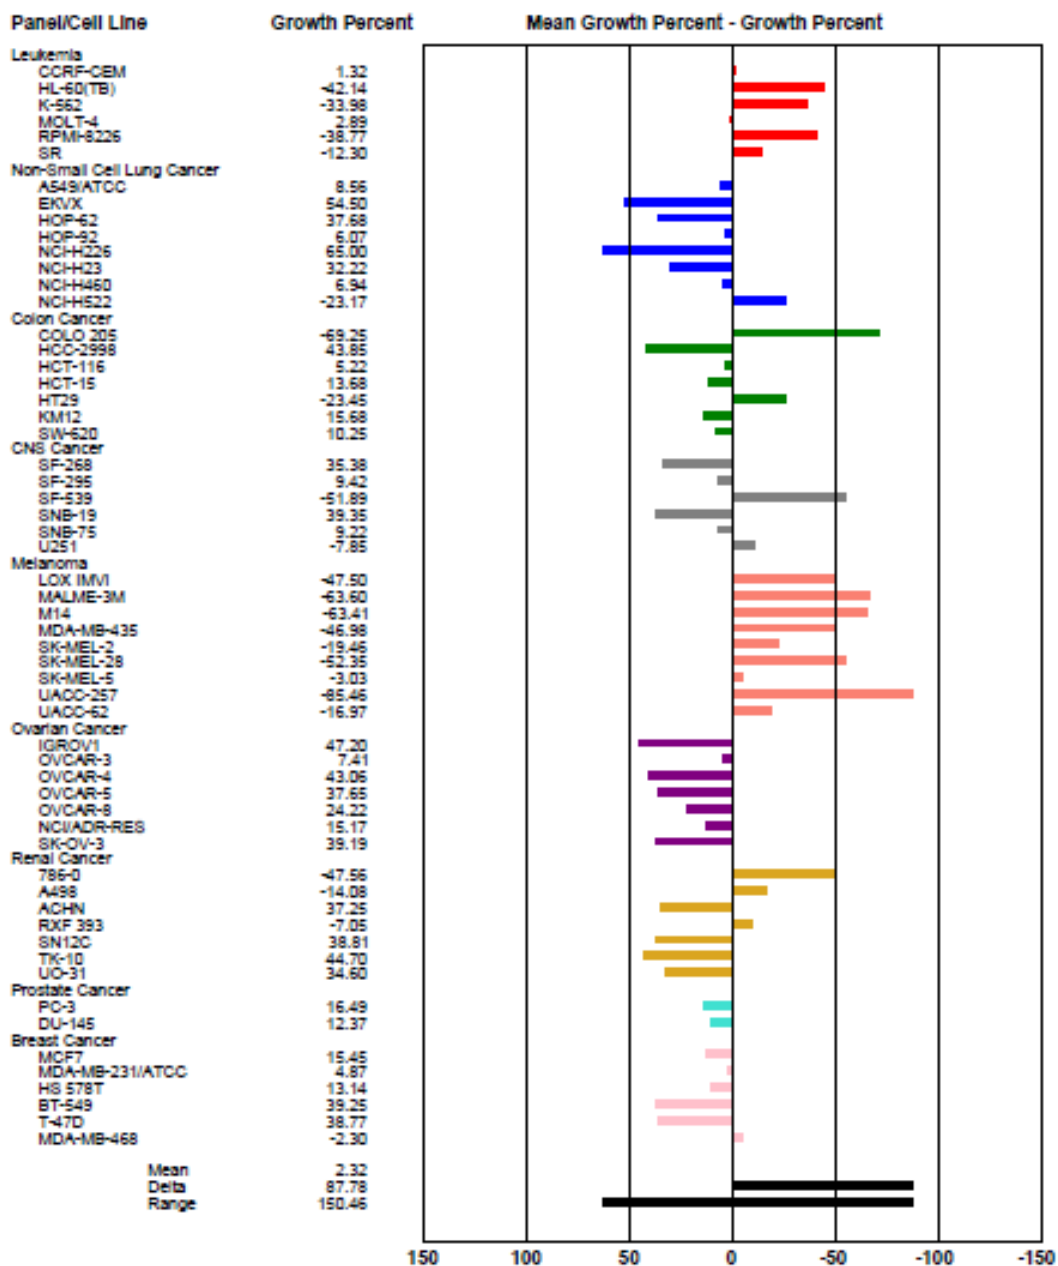



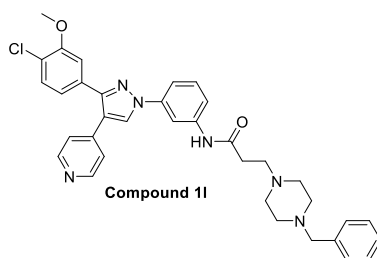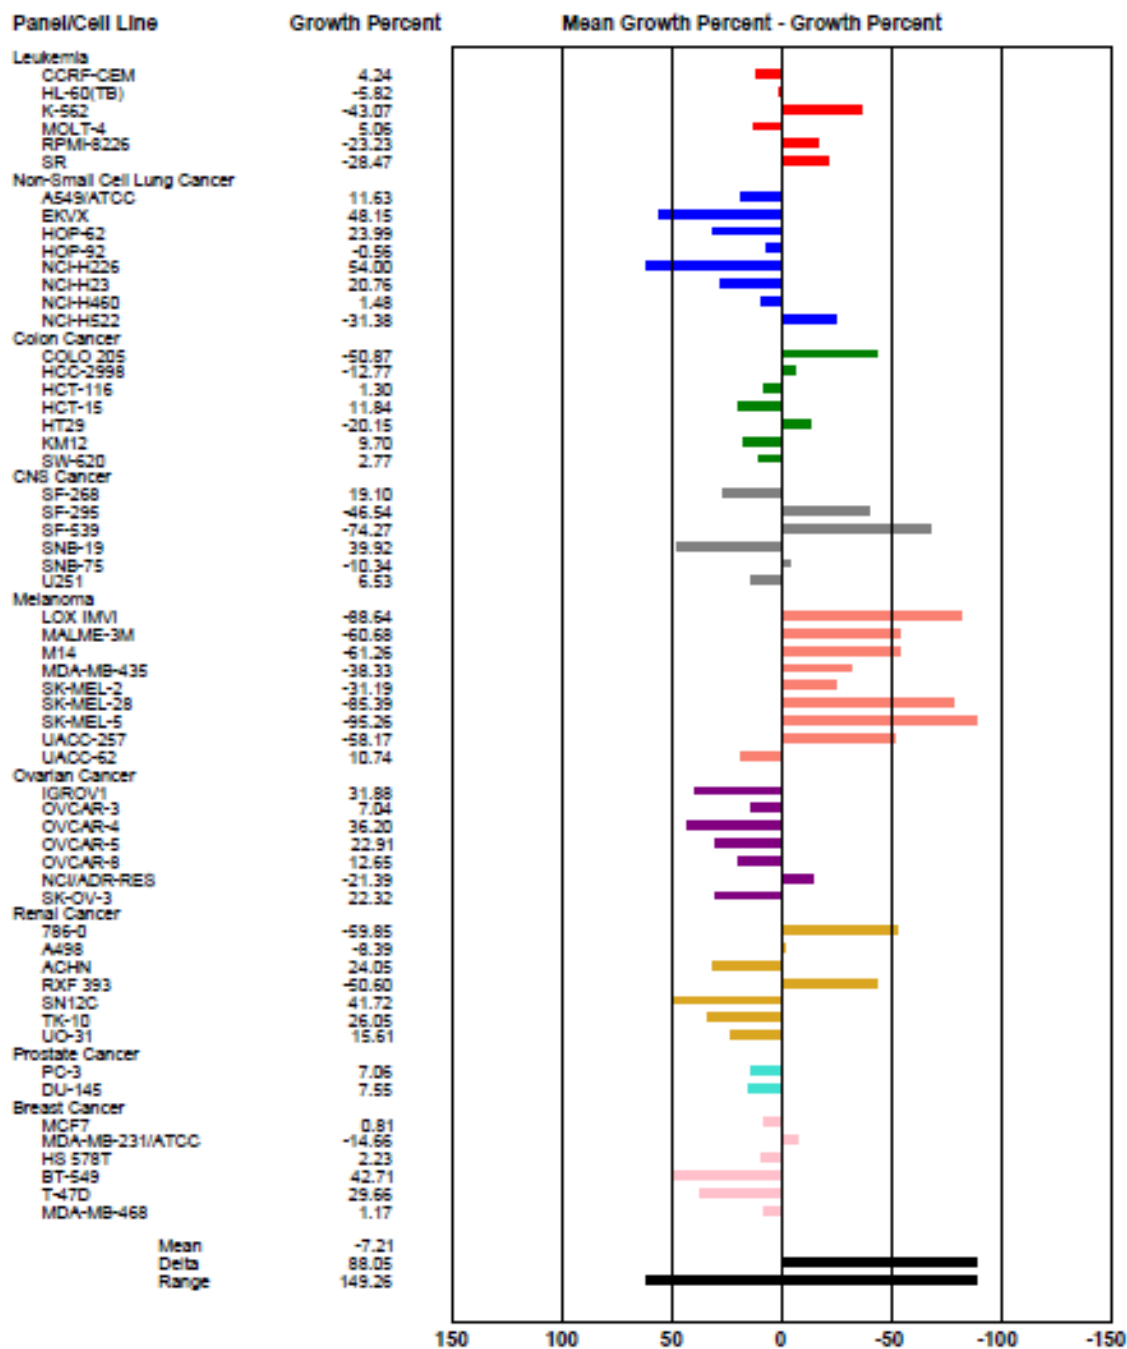











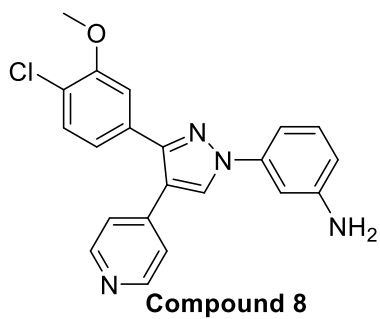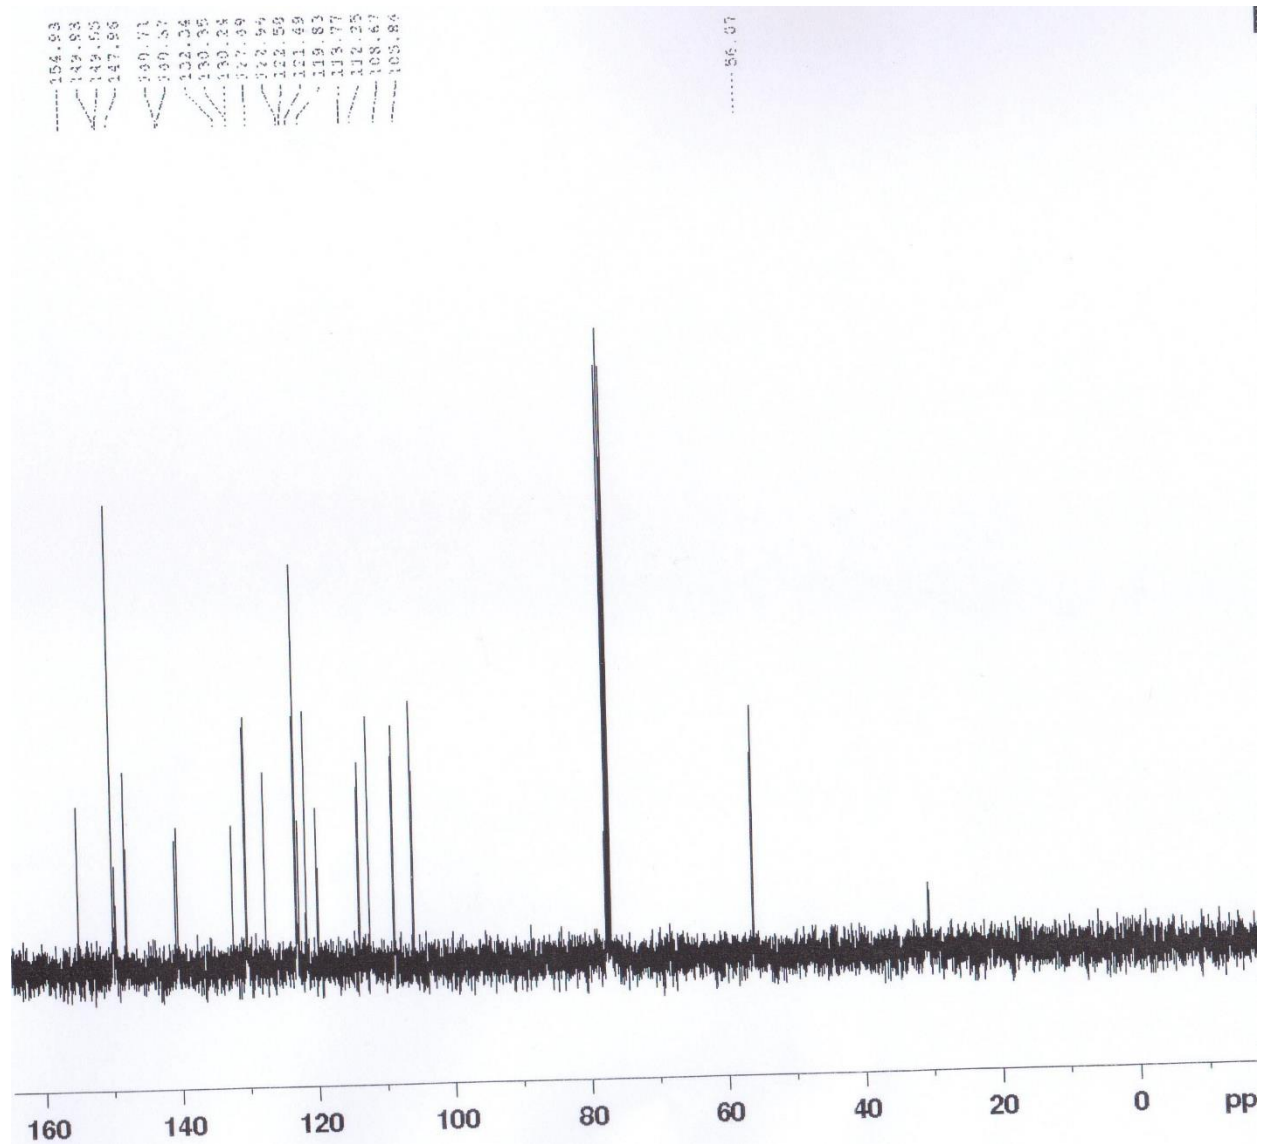

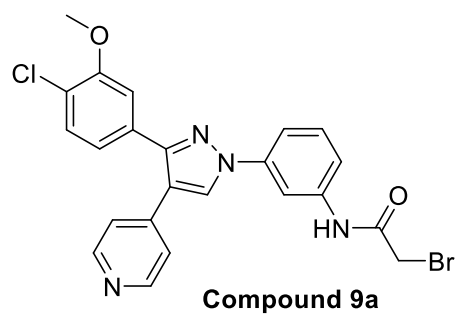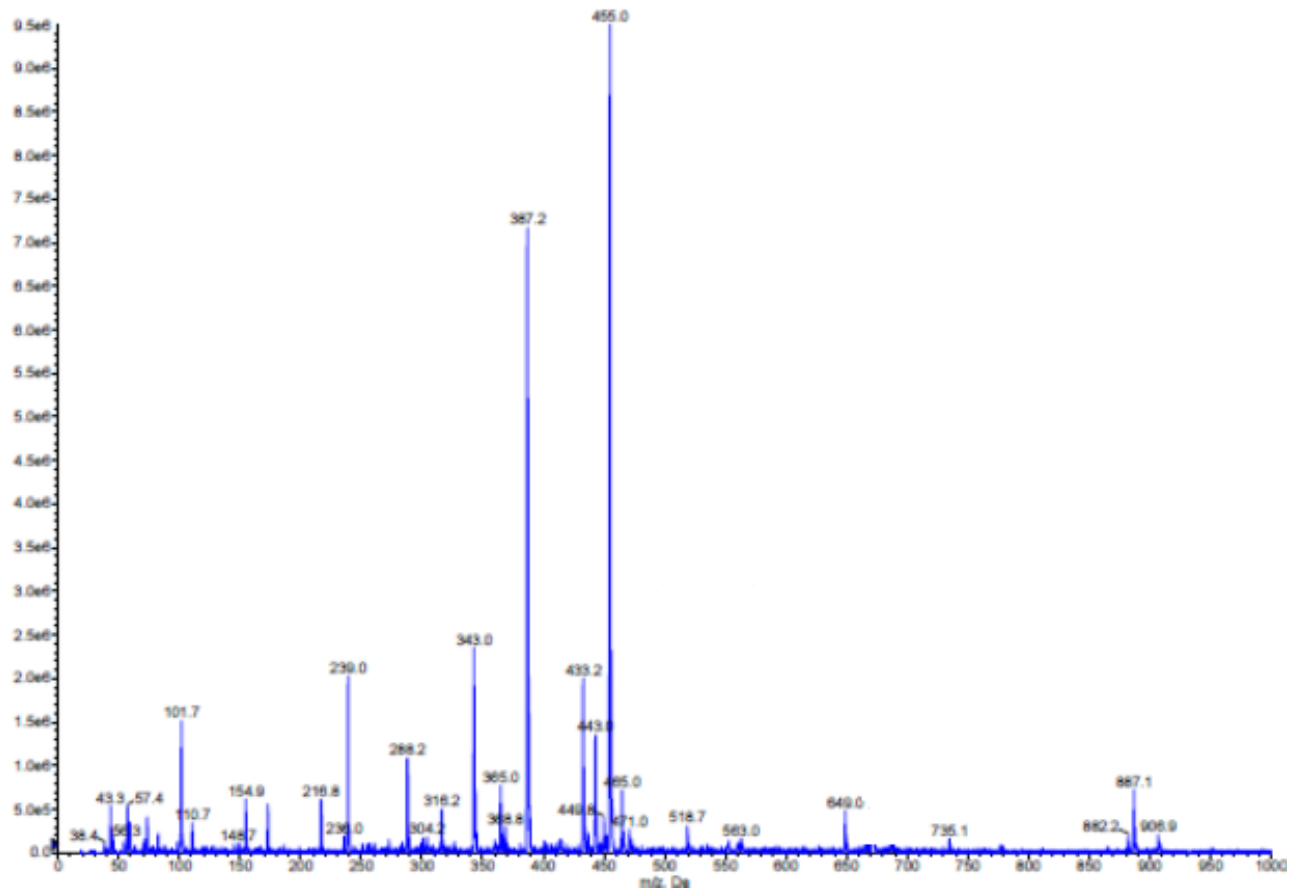

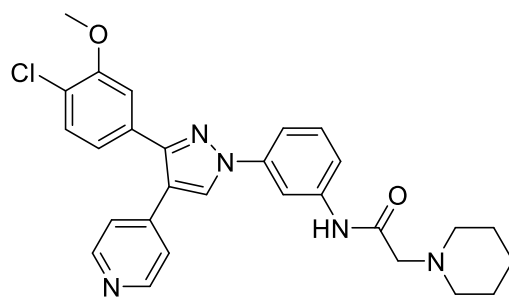

**Compound 1a**

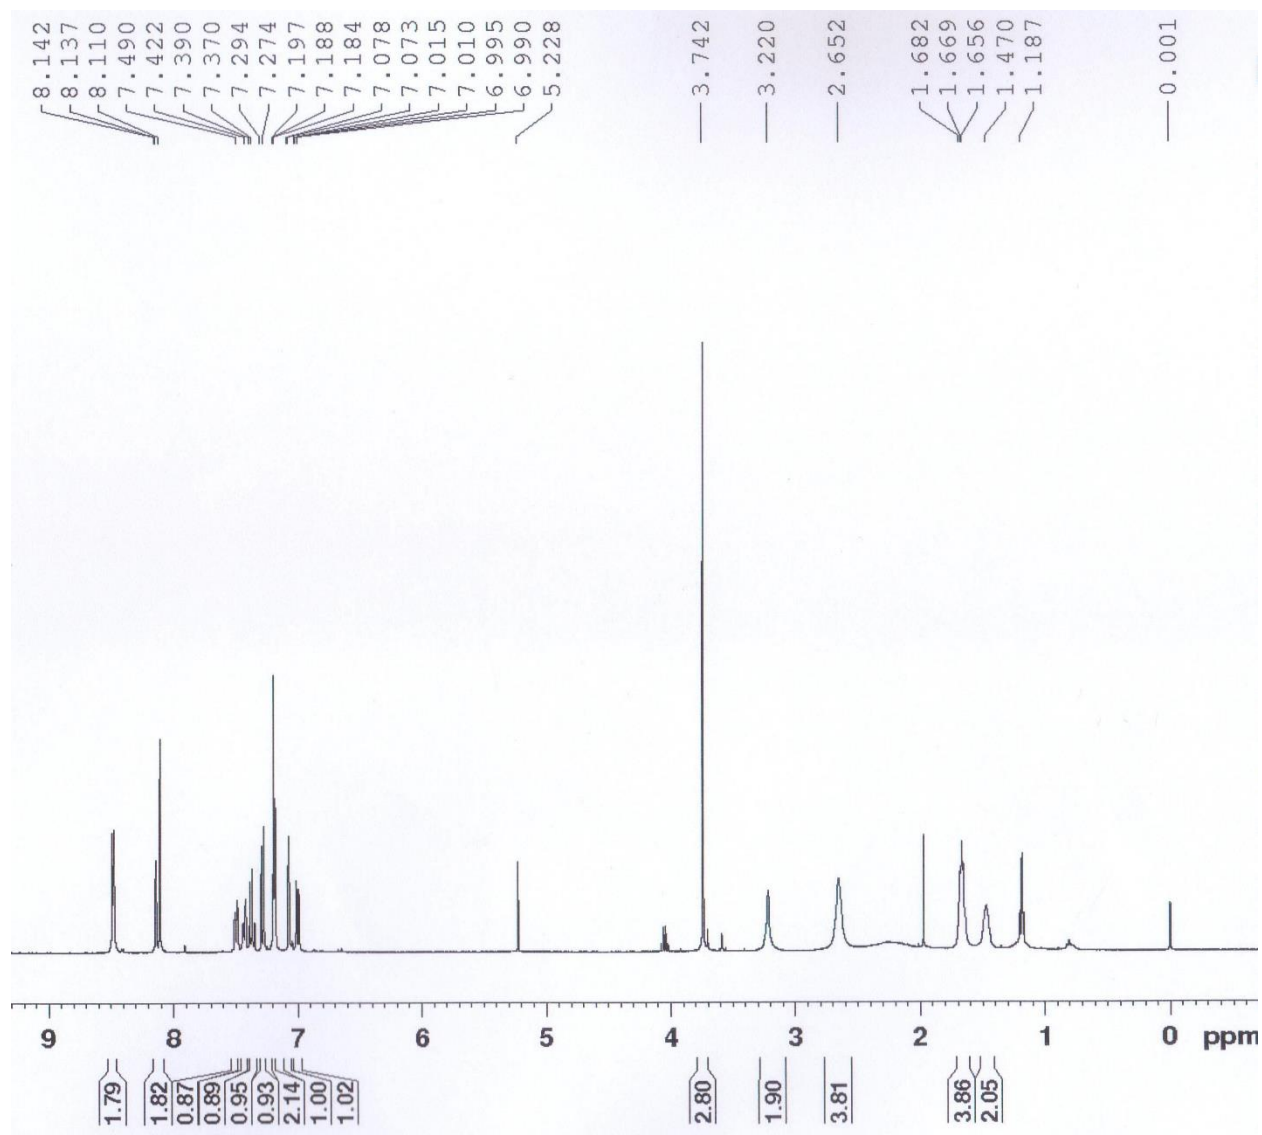



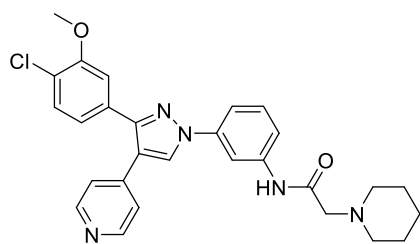

Compound 1a

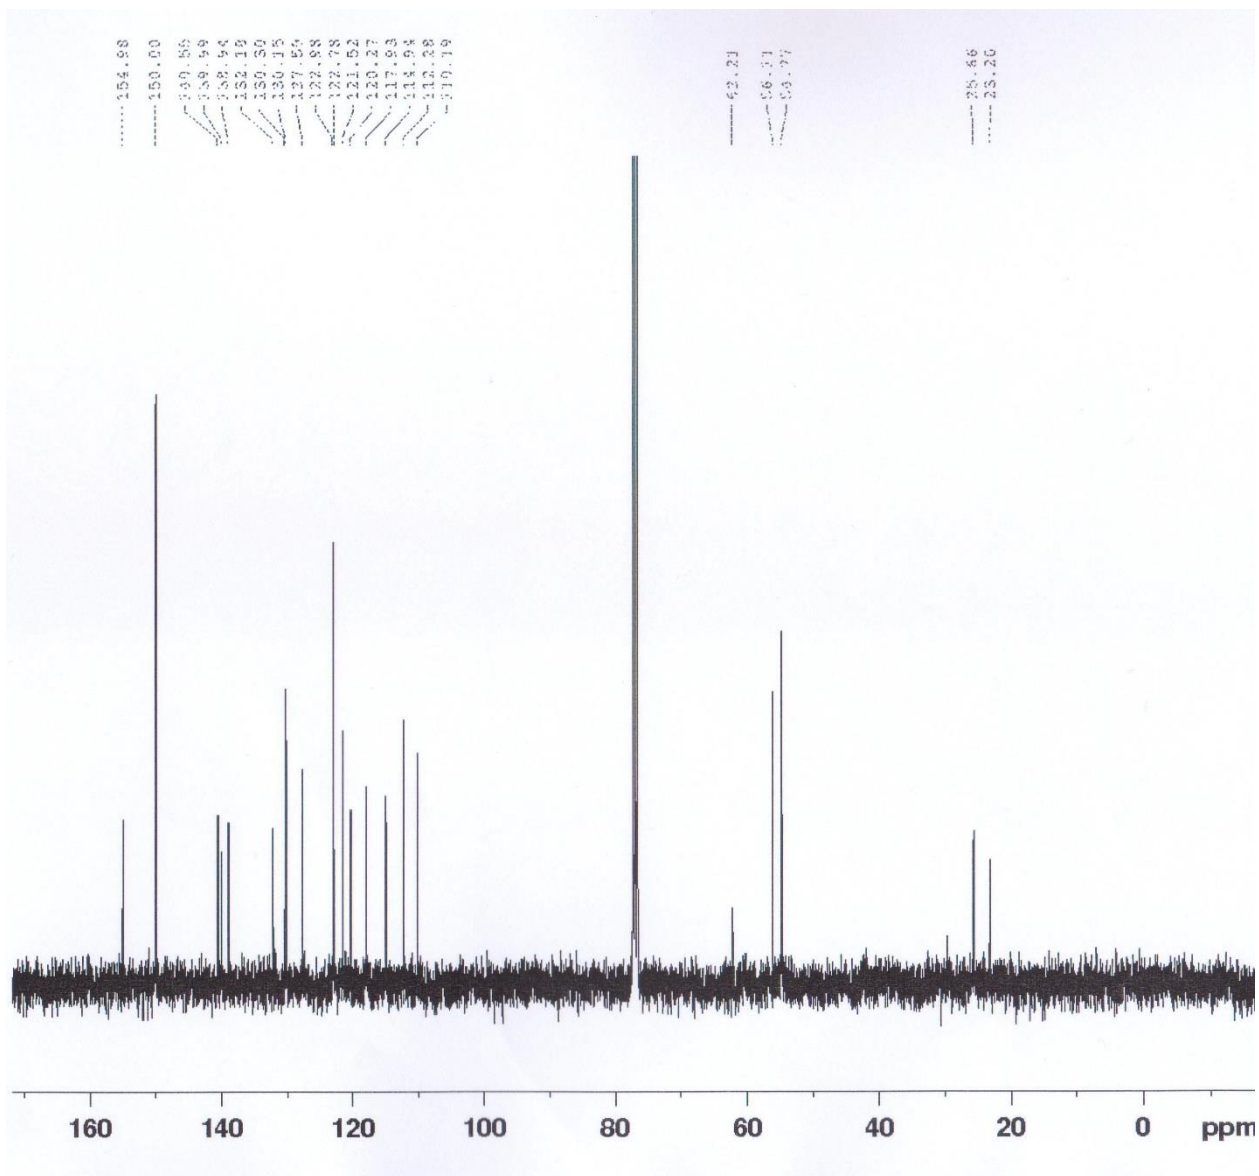

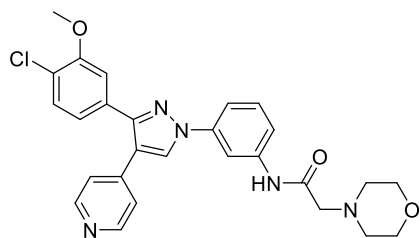

Compound 1b

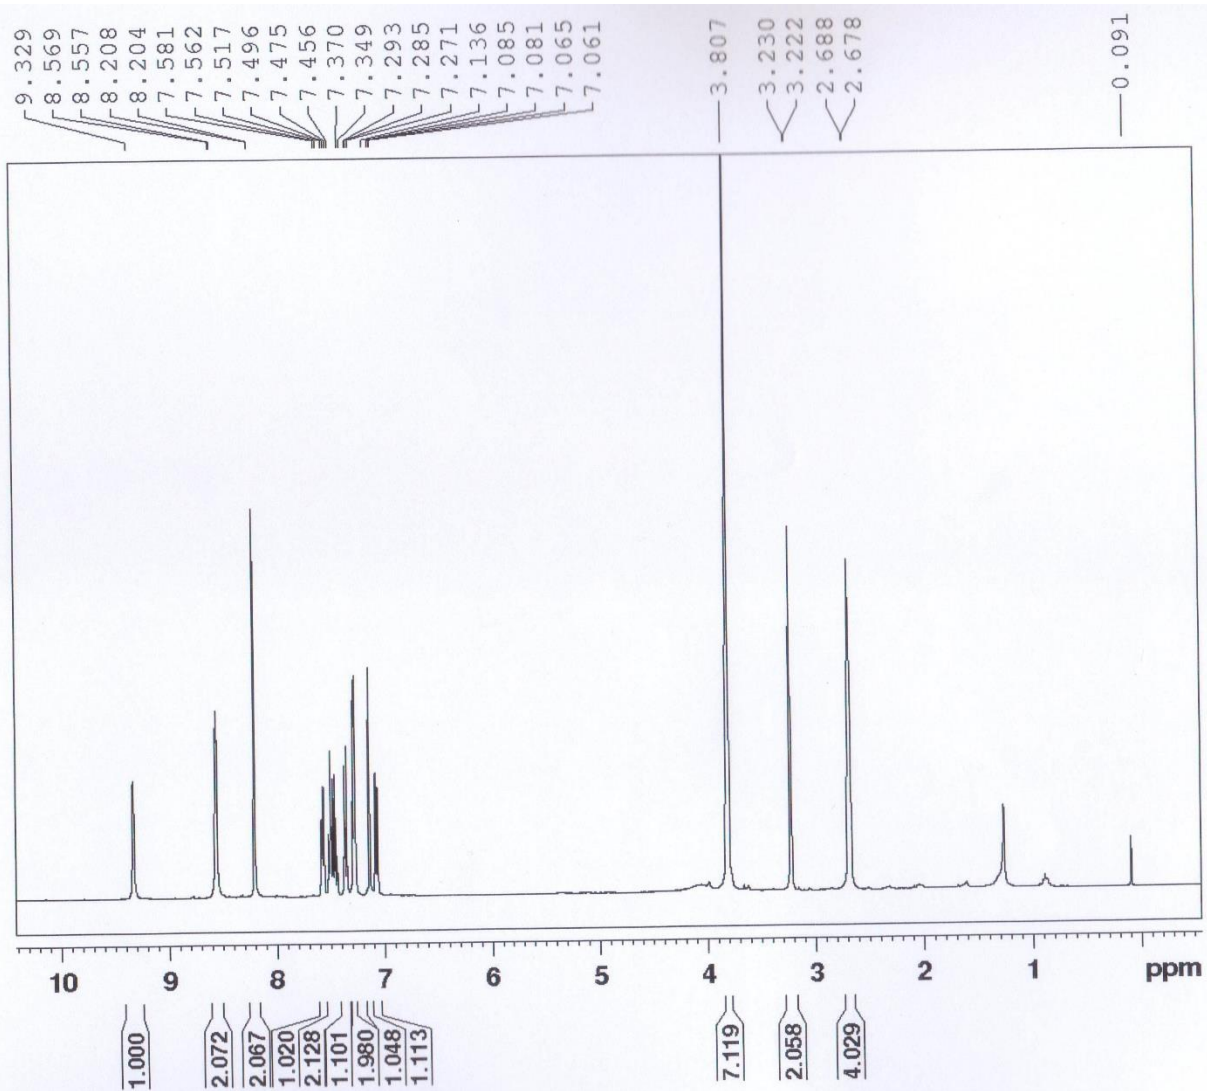

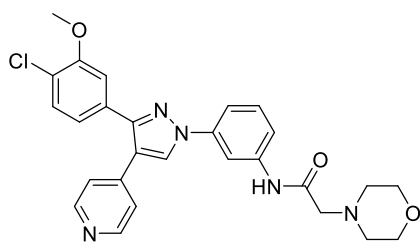

Compound 1b

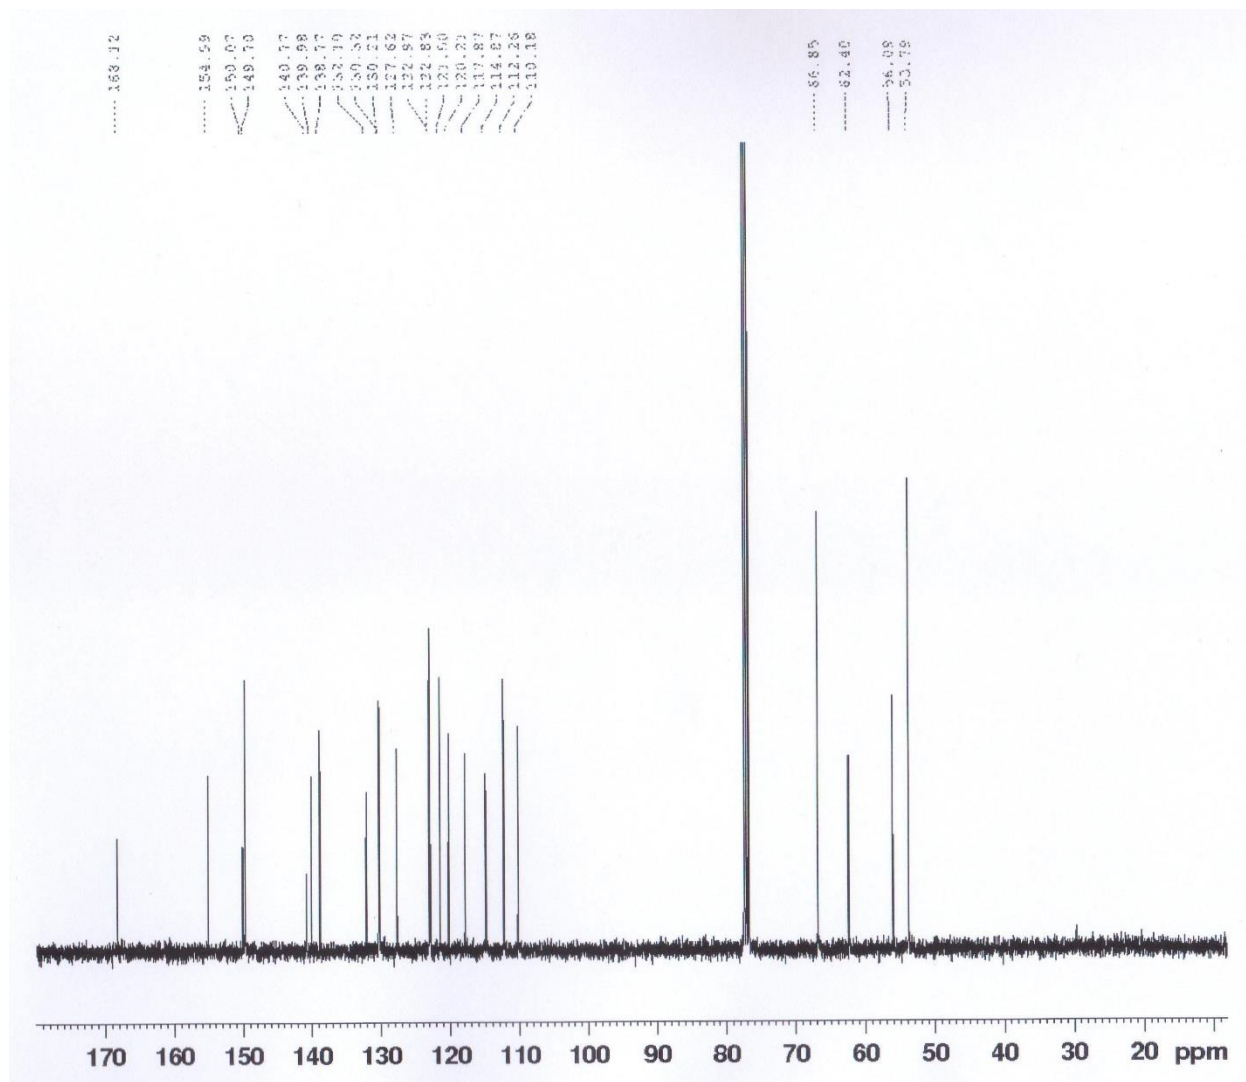

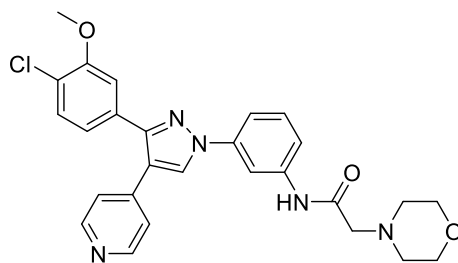

**Compound 1b**  
Chemical Formula:  $C_{27}H_{26}ClN_5O_3$   
 $m/z + H^+$ : 505.1

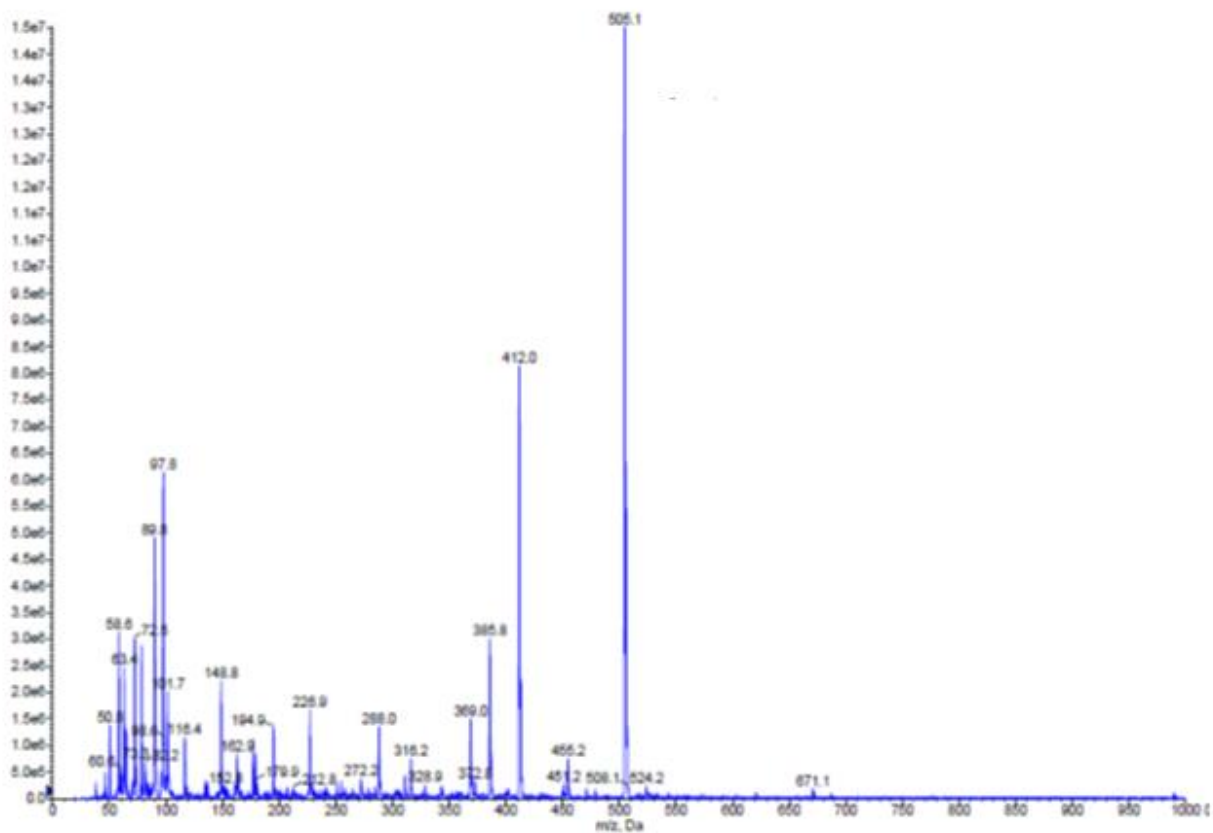

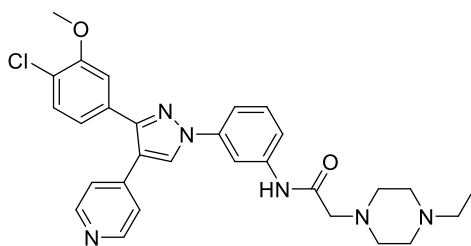

Compound 1d

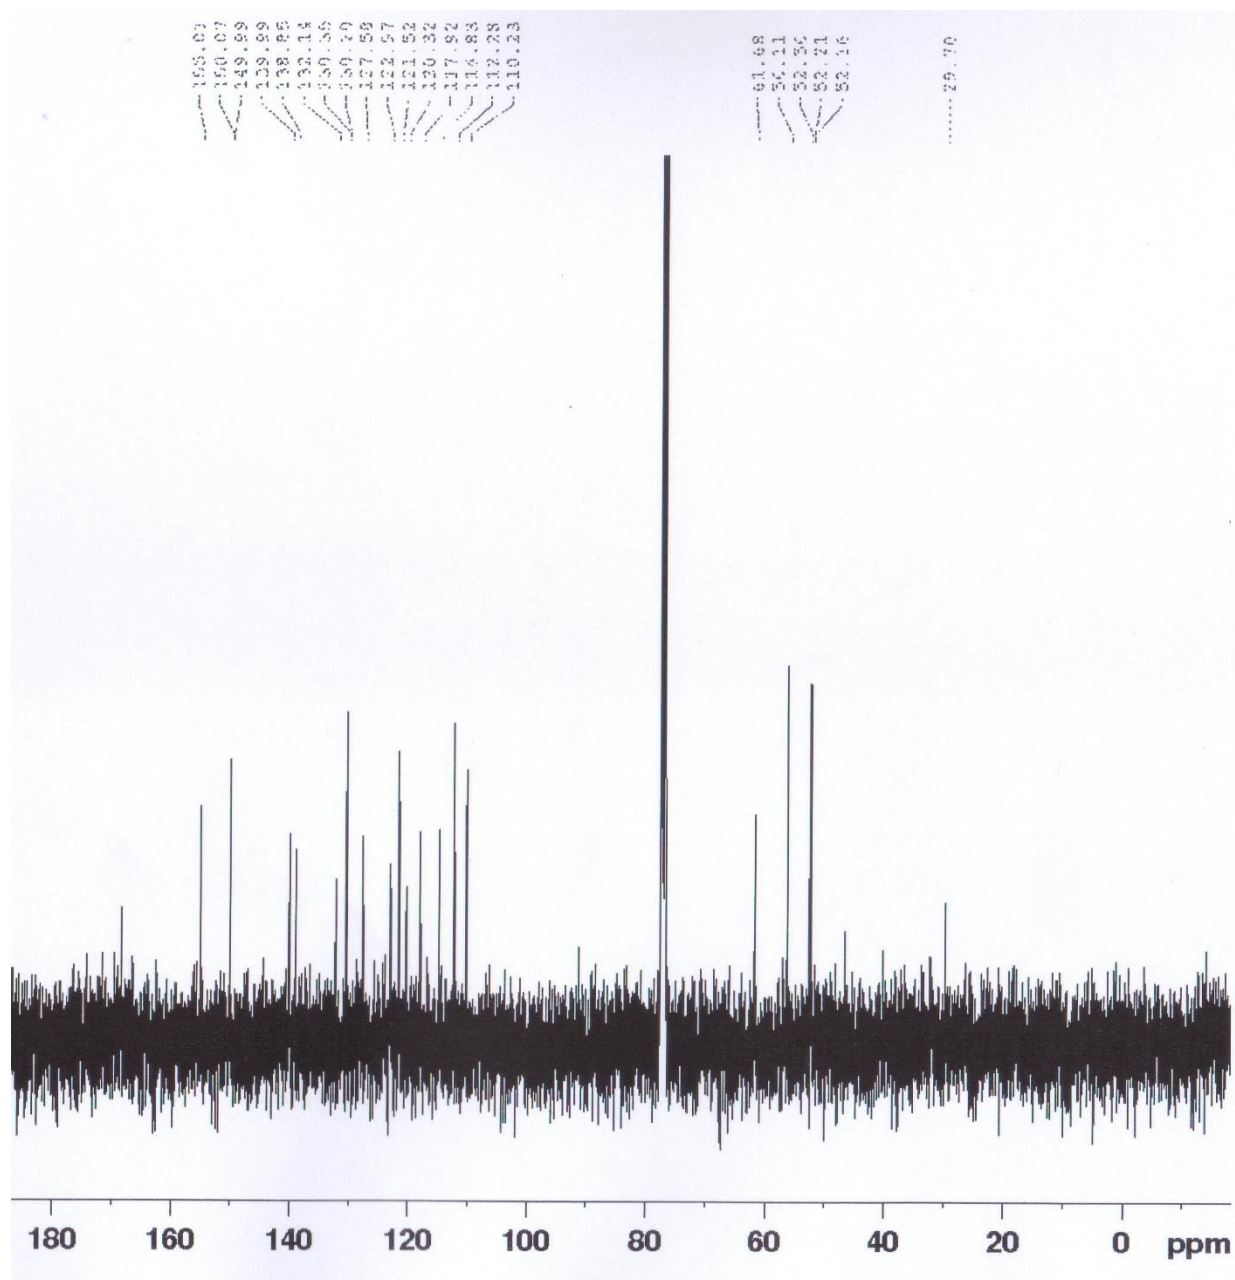

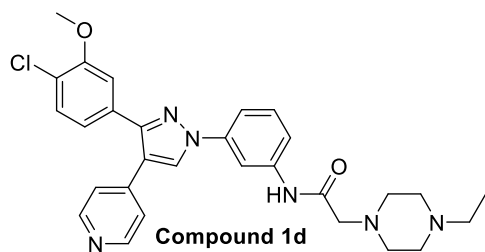

Chemical Formula:  $C_{29}H_{31}ClN_6O_2$   
 m/z: 531.0

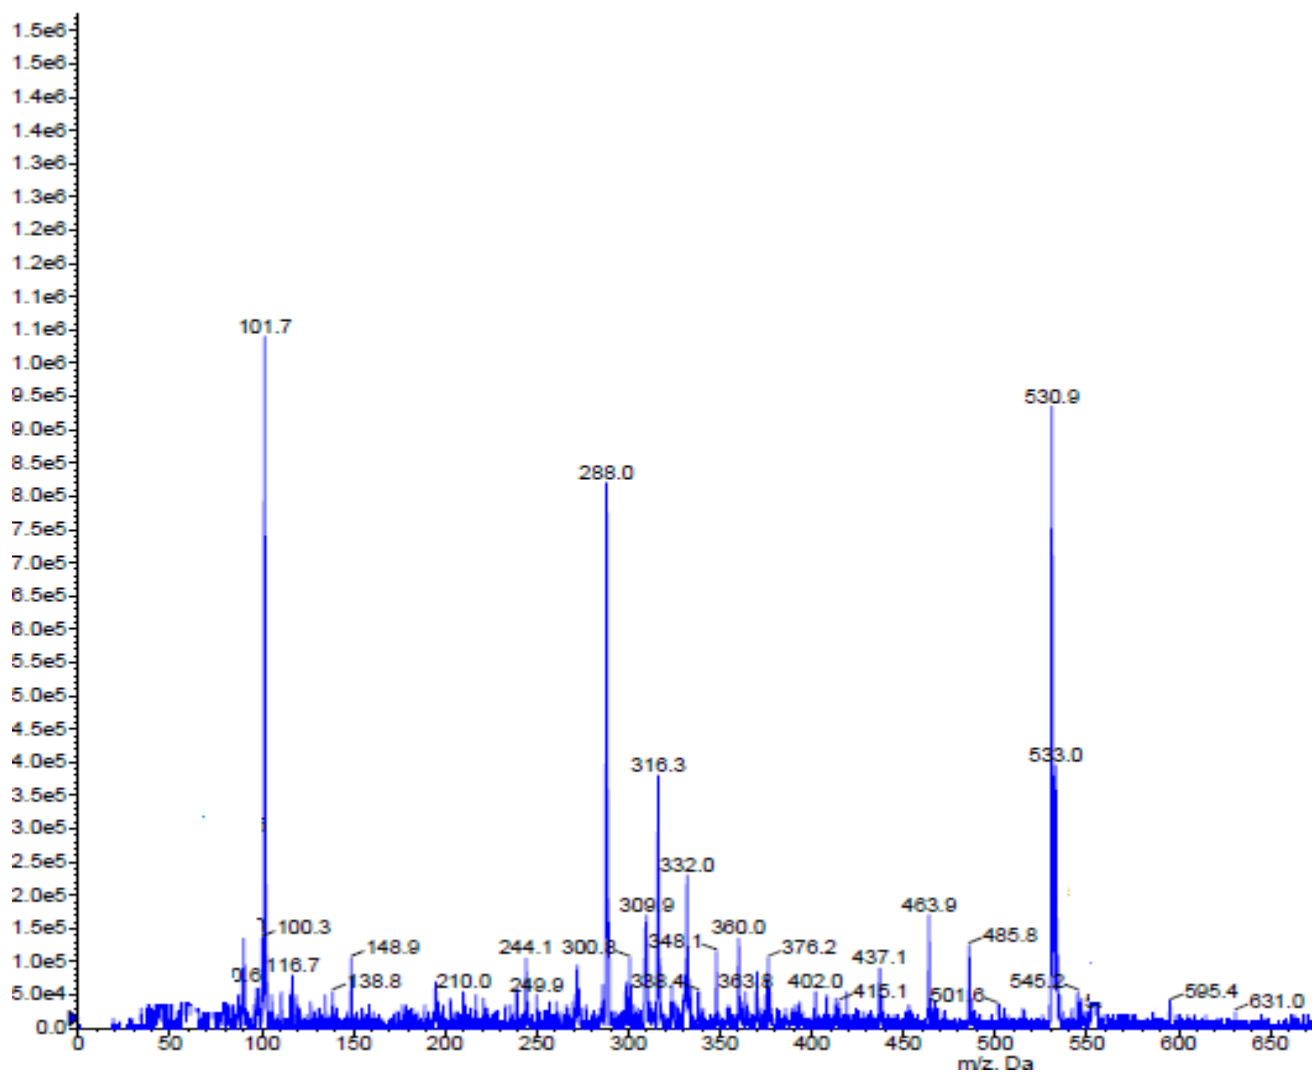

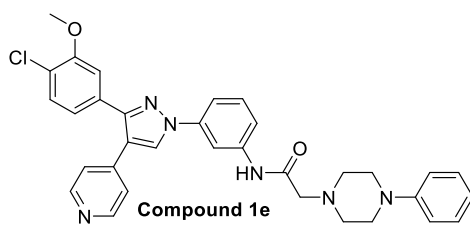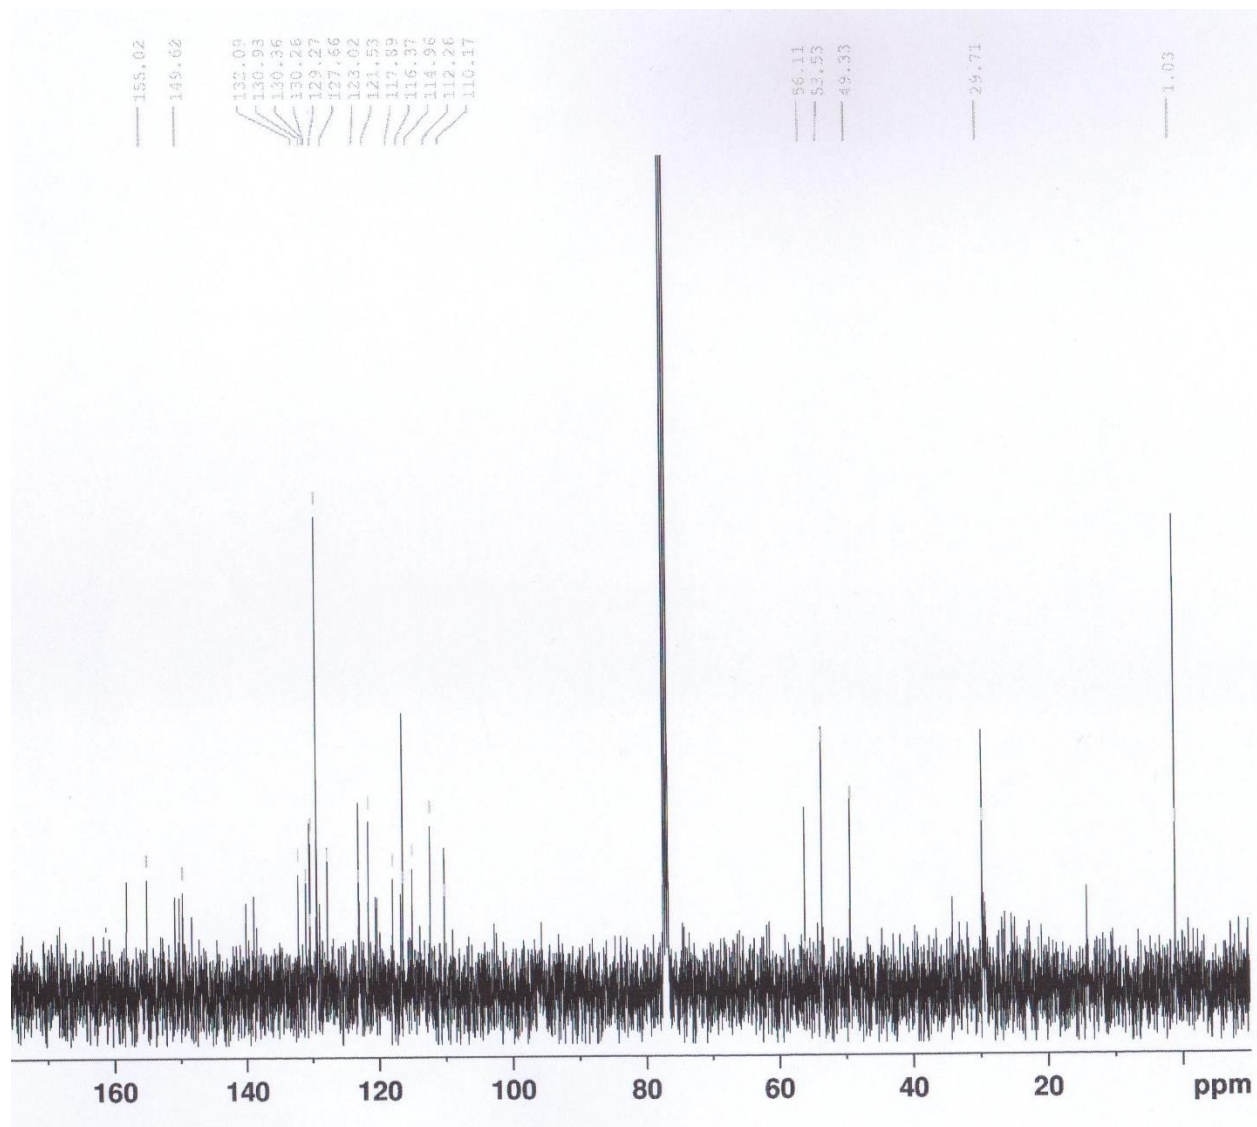



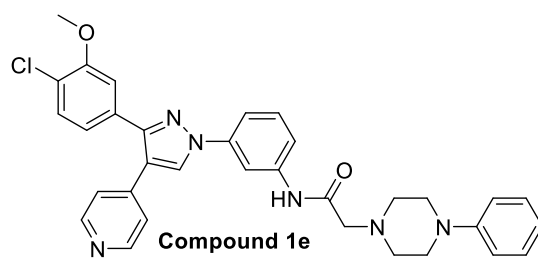

Chemical Formula:  $C_{33}H_{31}ClN_6O_2$   
 $m/z: + 2H^+ 579.9$

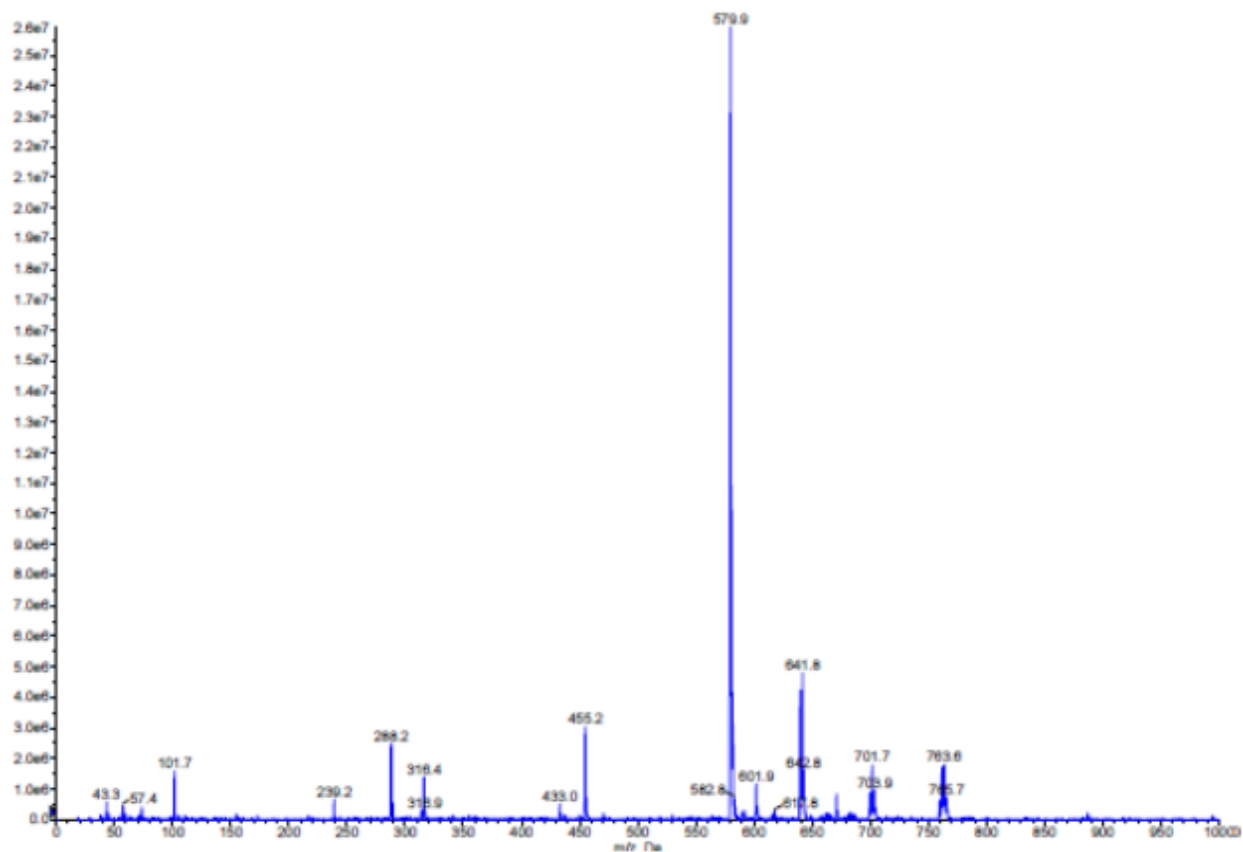



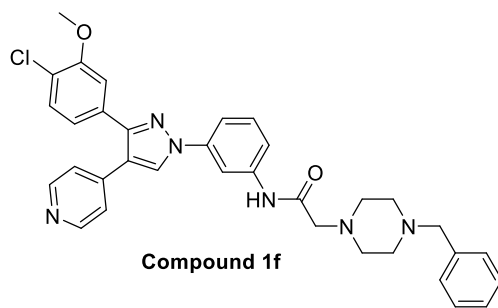

Compound 1f

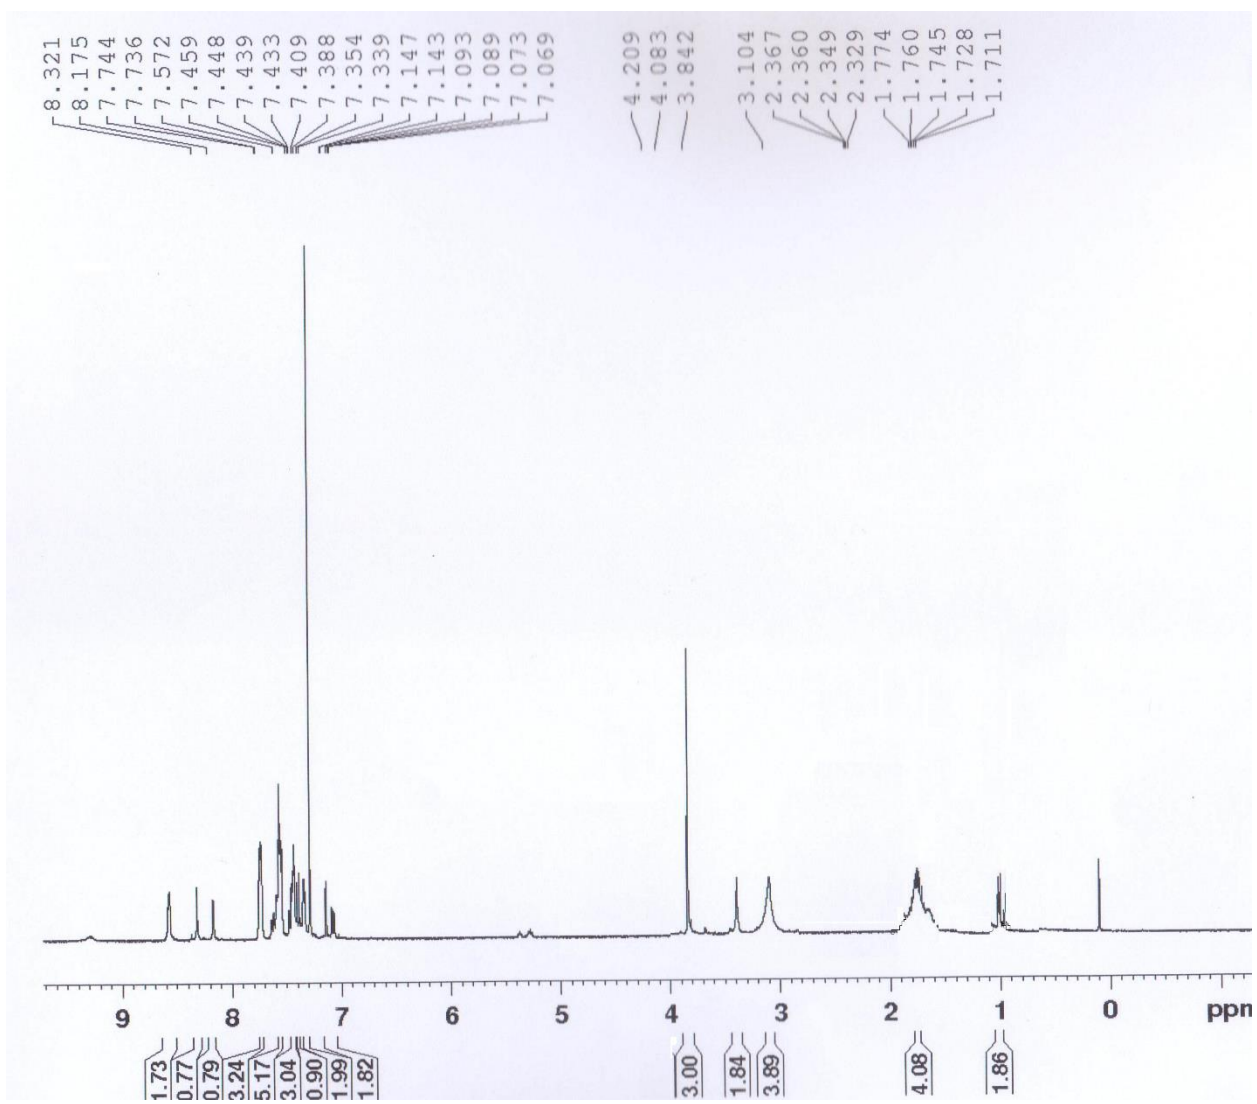

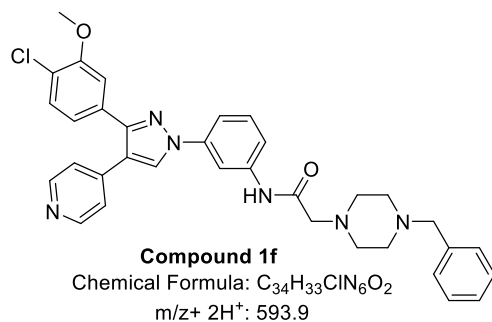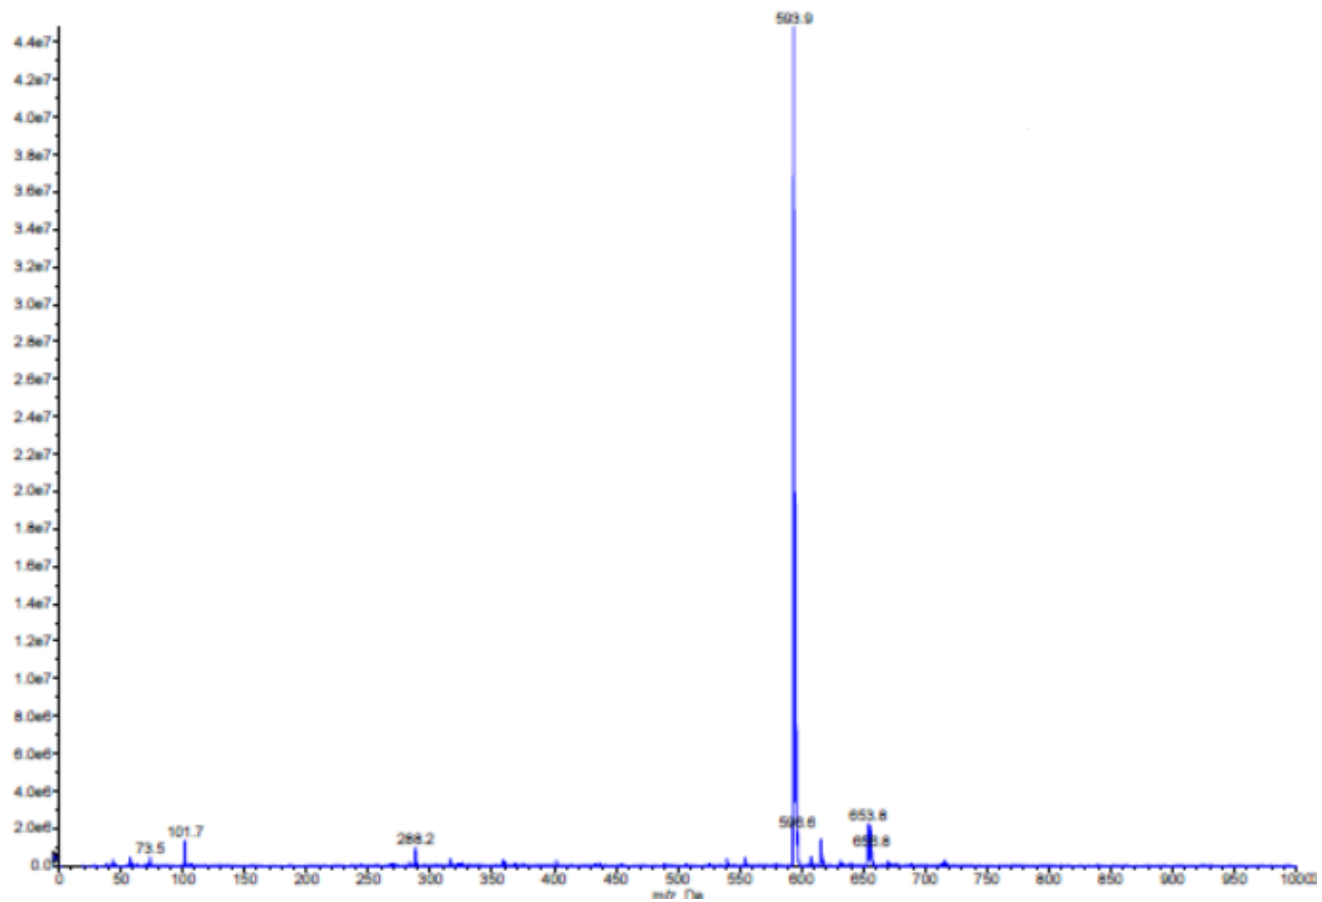

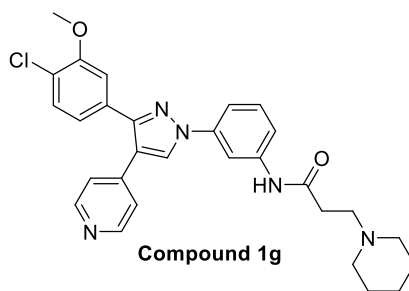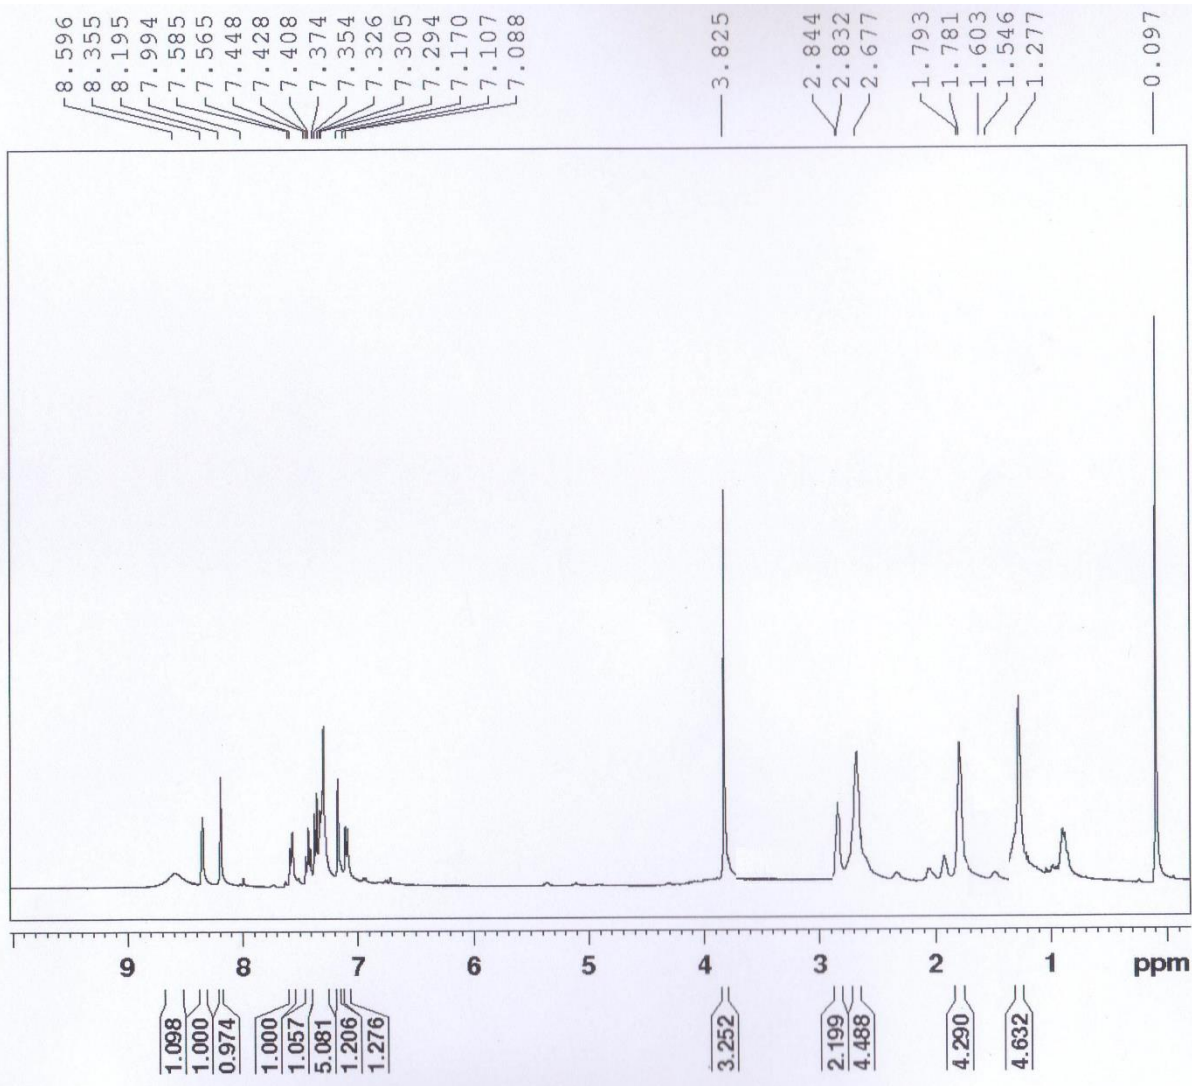

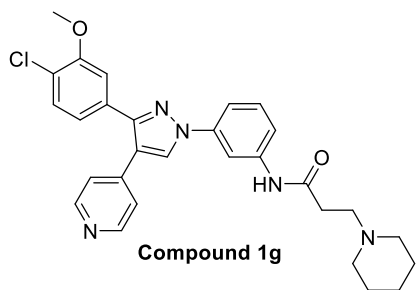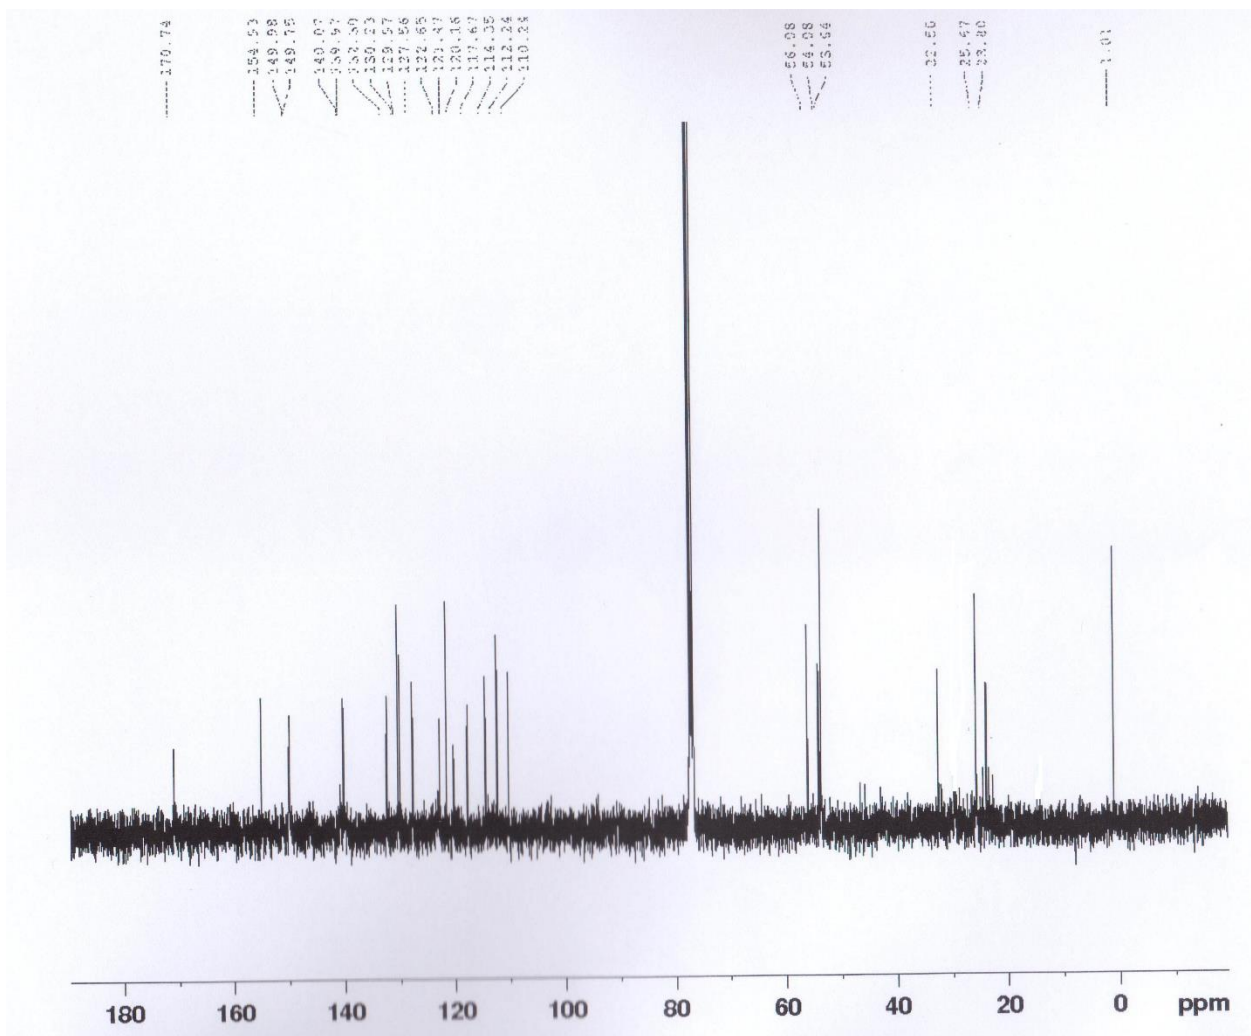

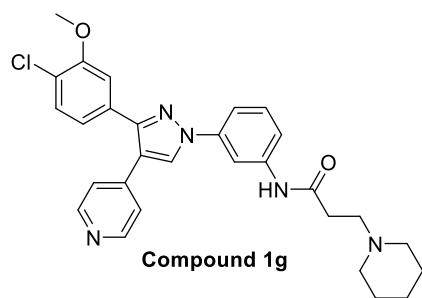

Chemical Formula:  $C_{29}H_{30}ClN_5O_2$   
m/z+ 2: 517.21

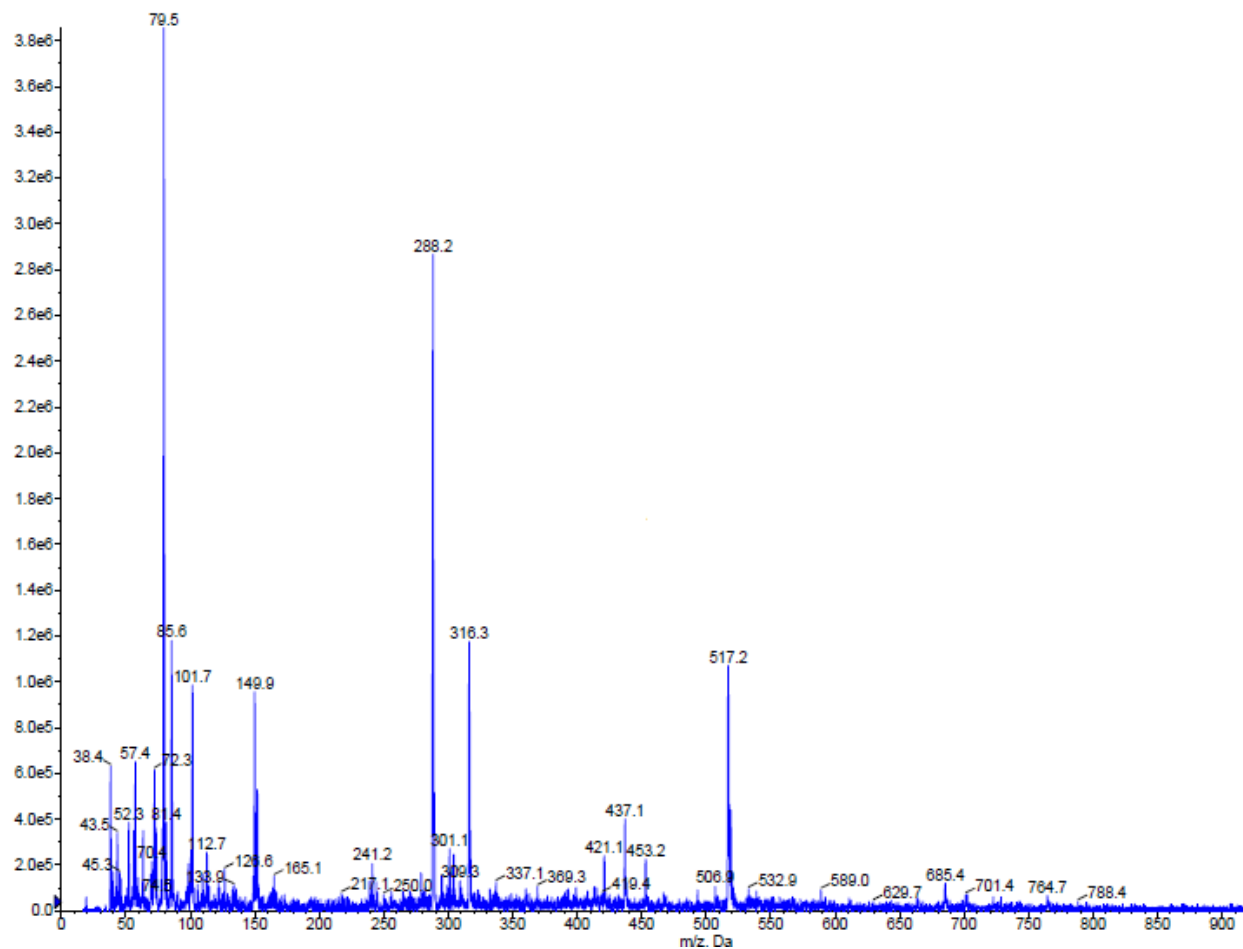

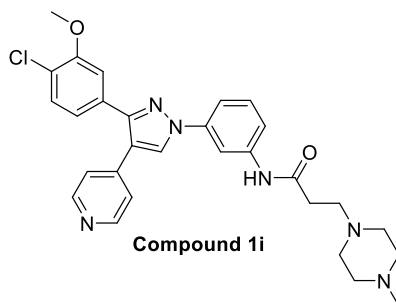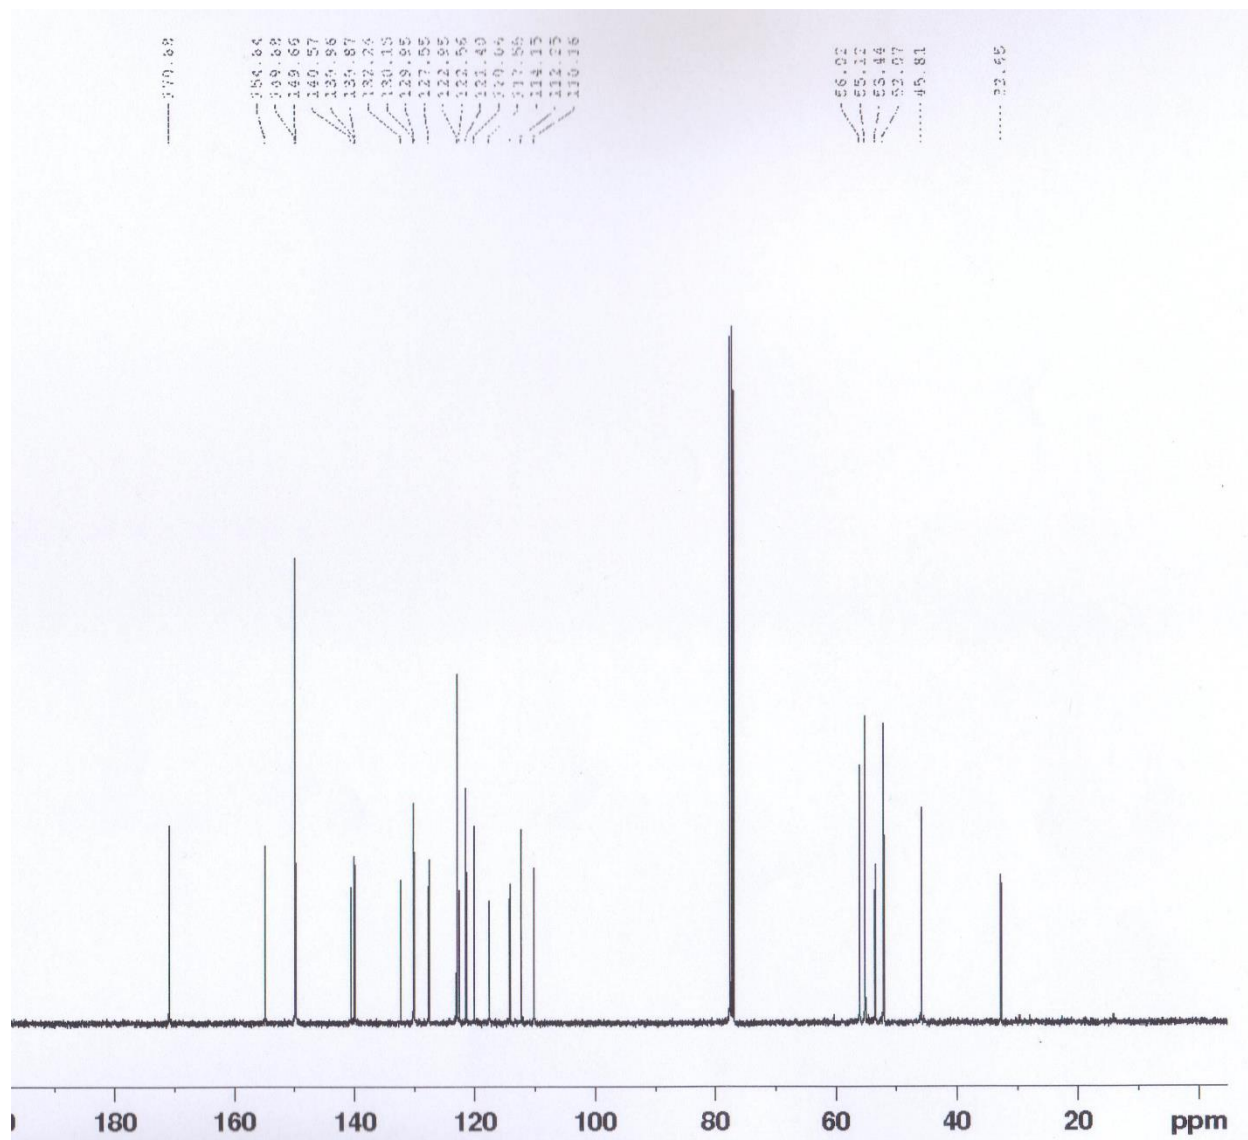

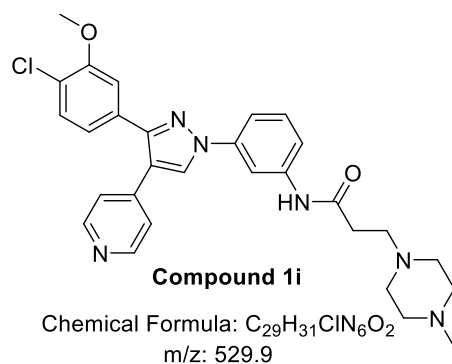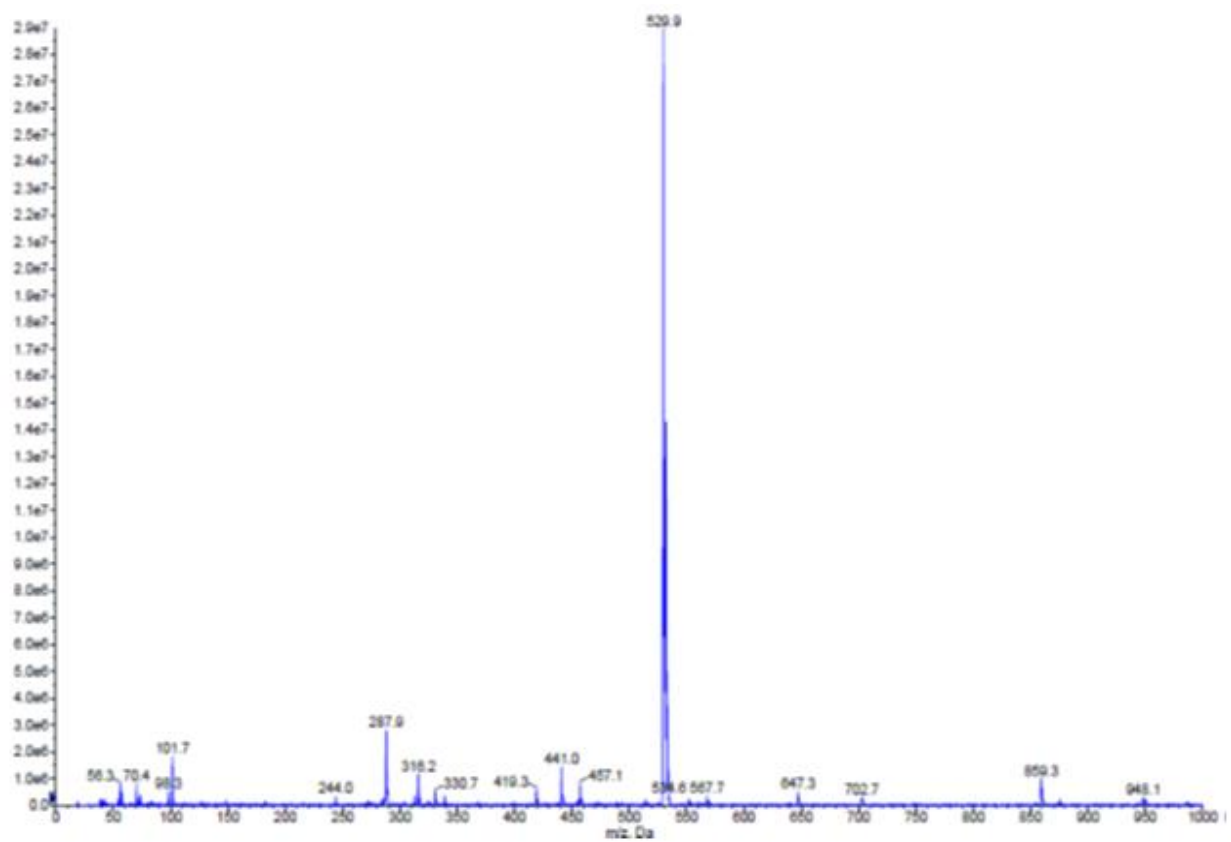

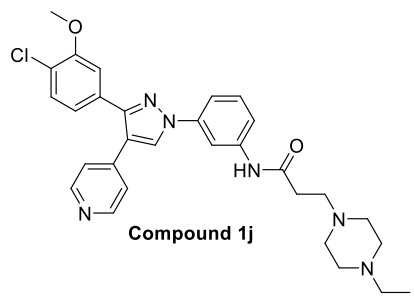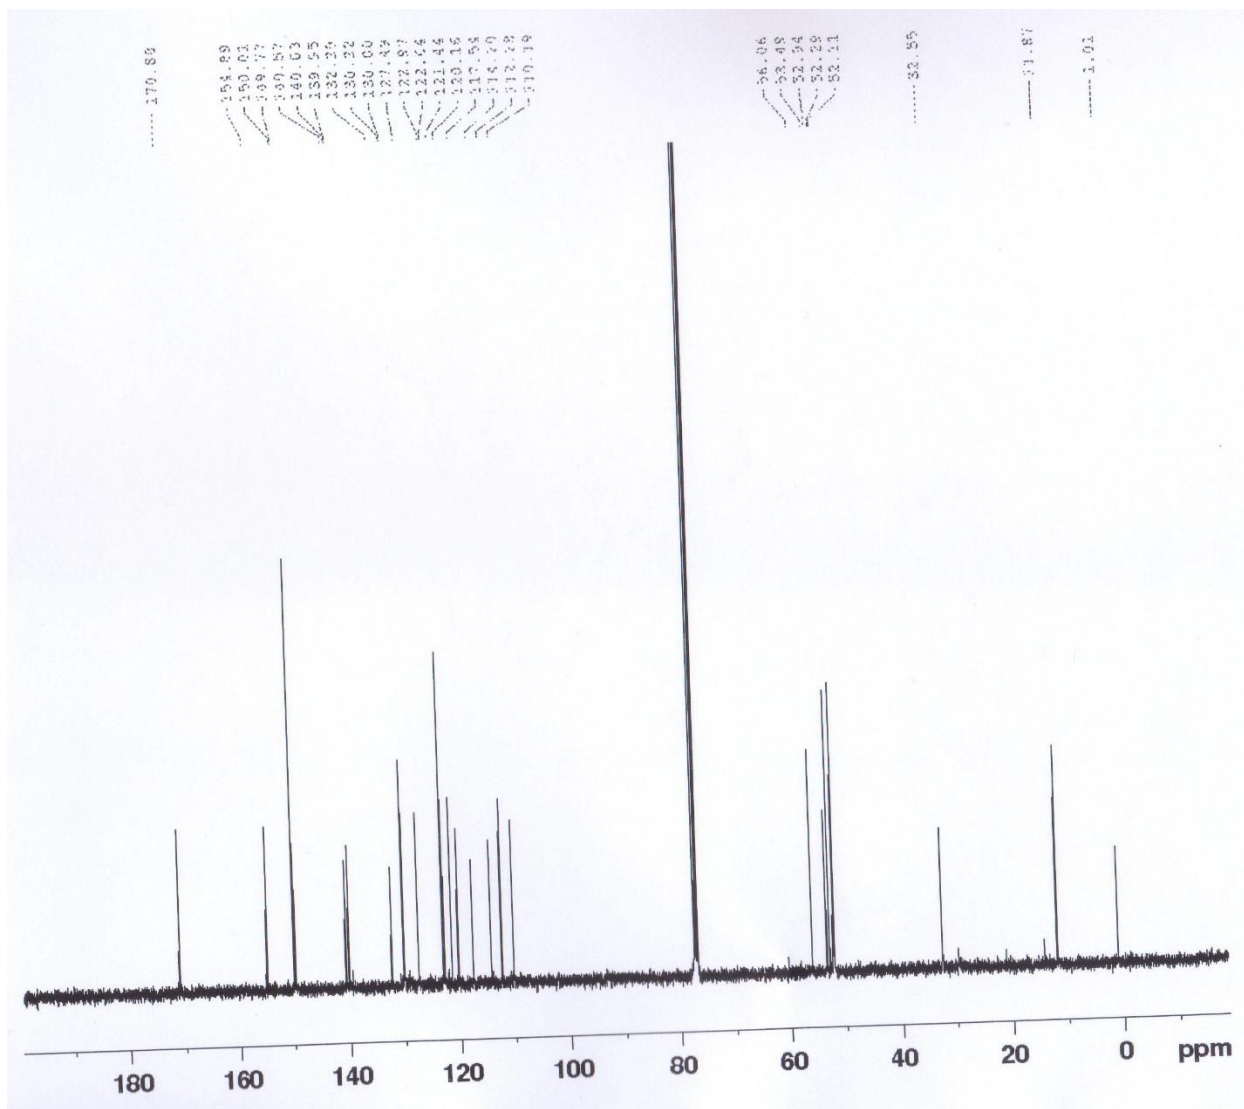



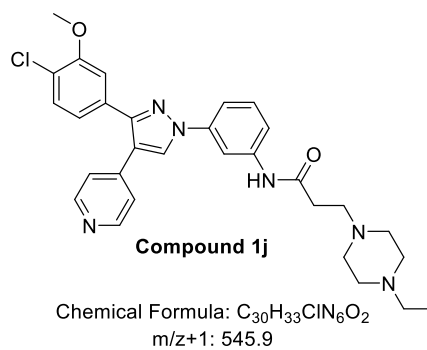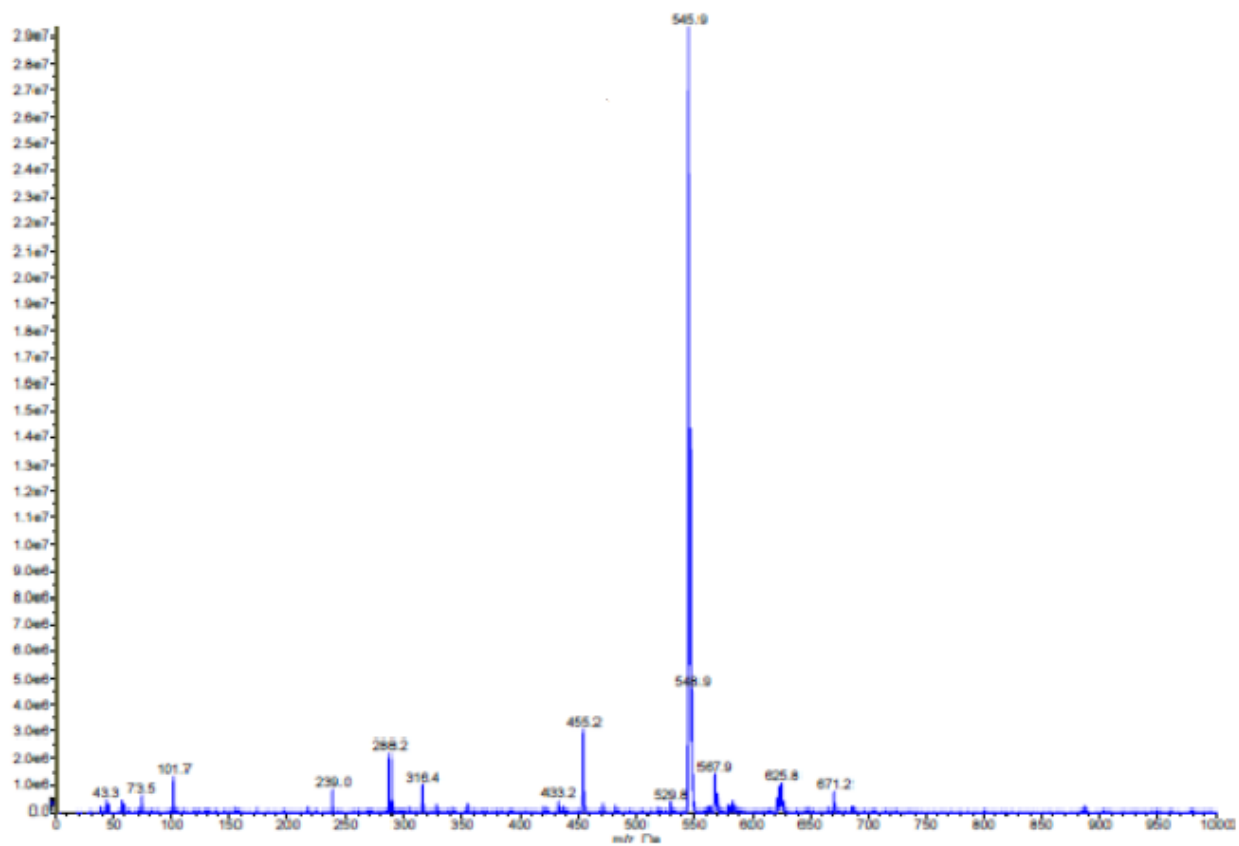

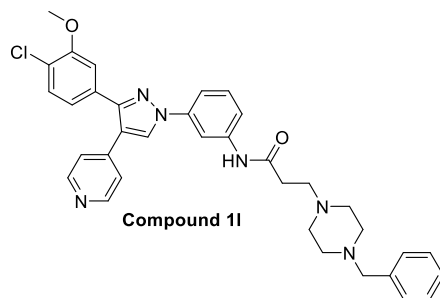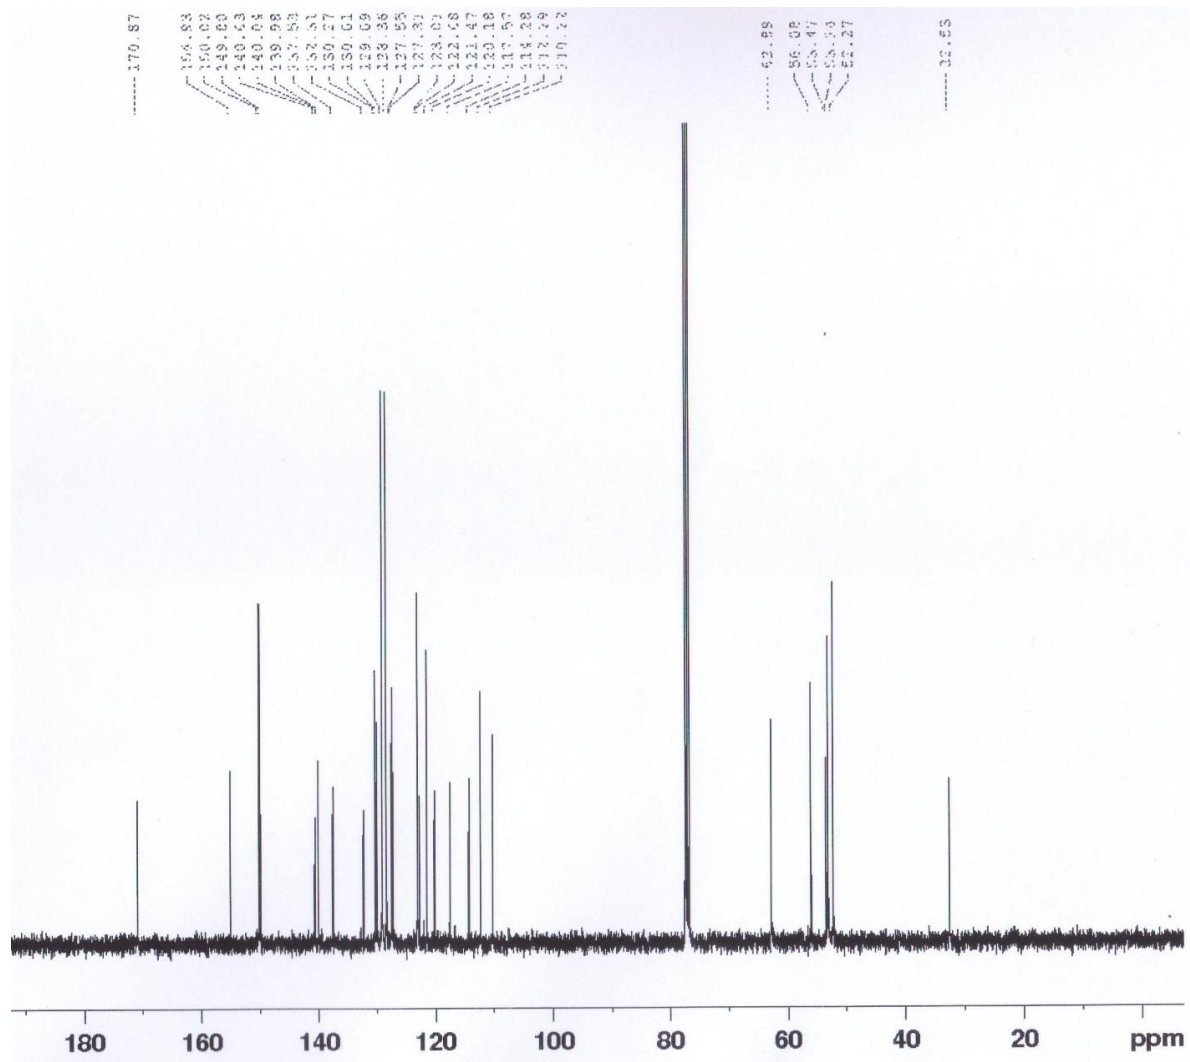

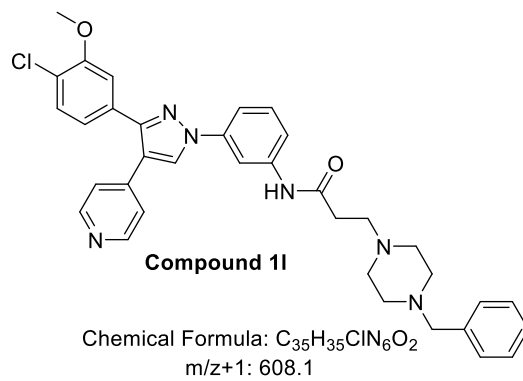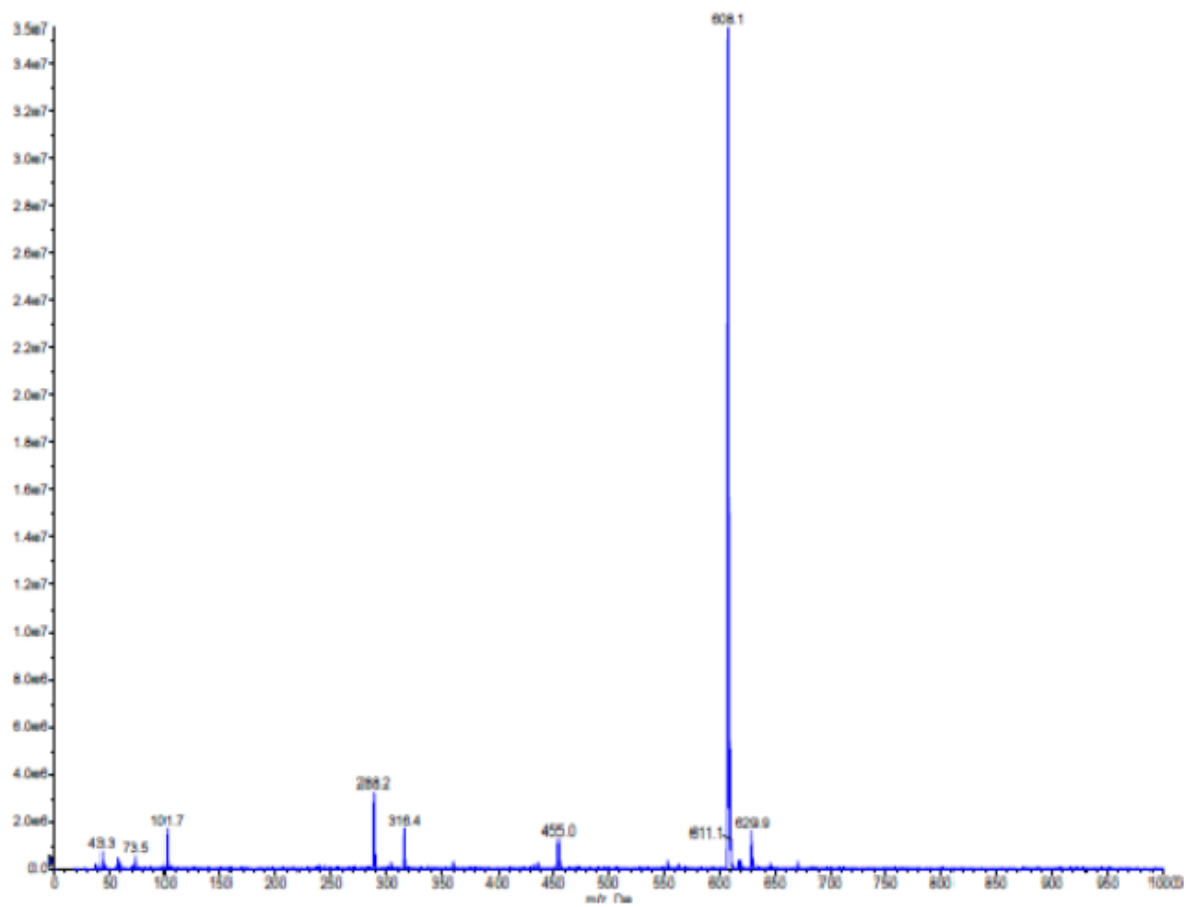

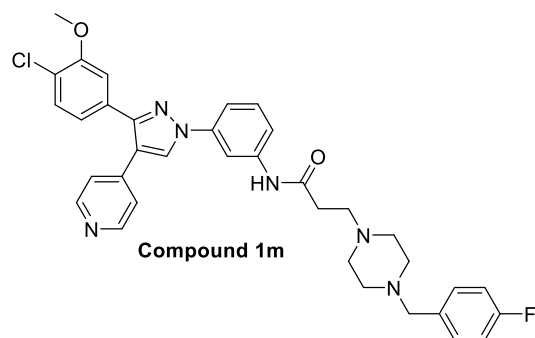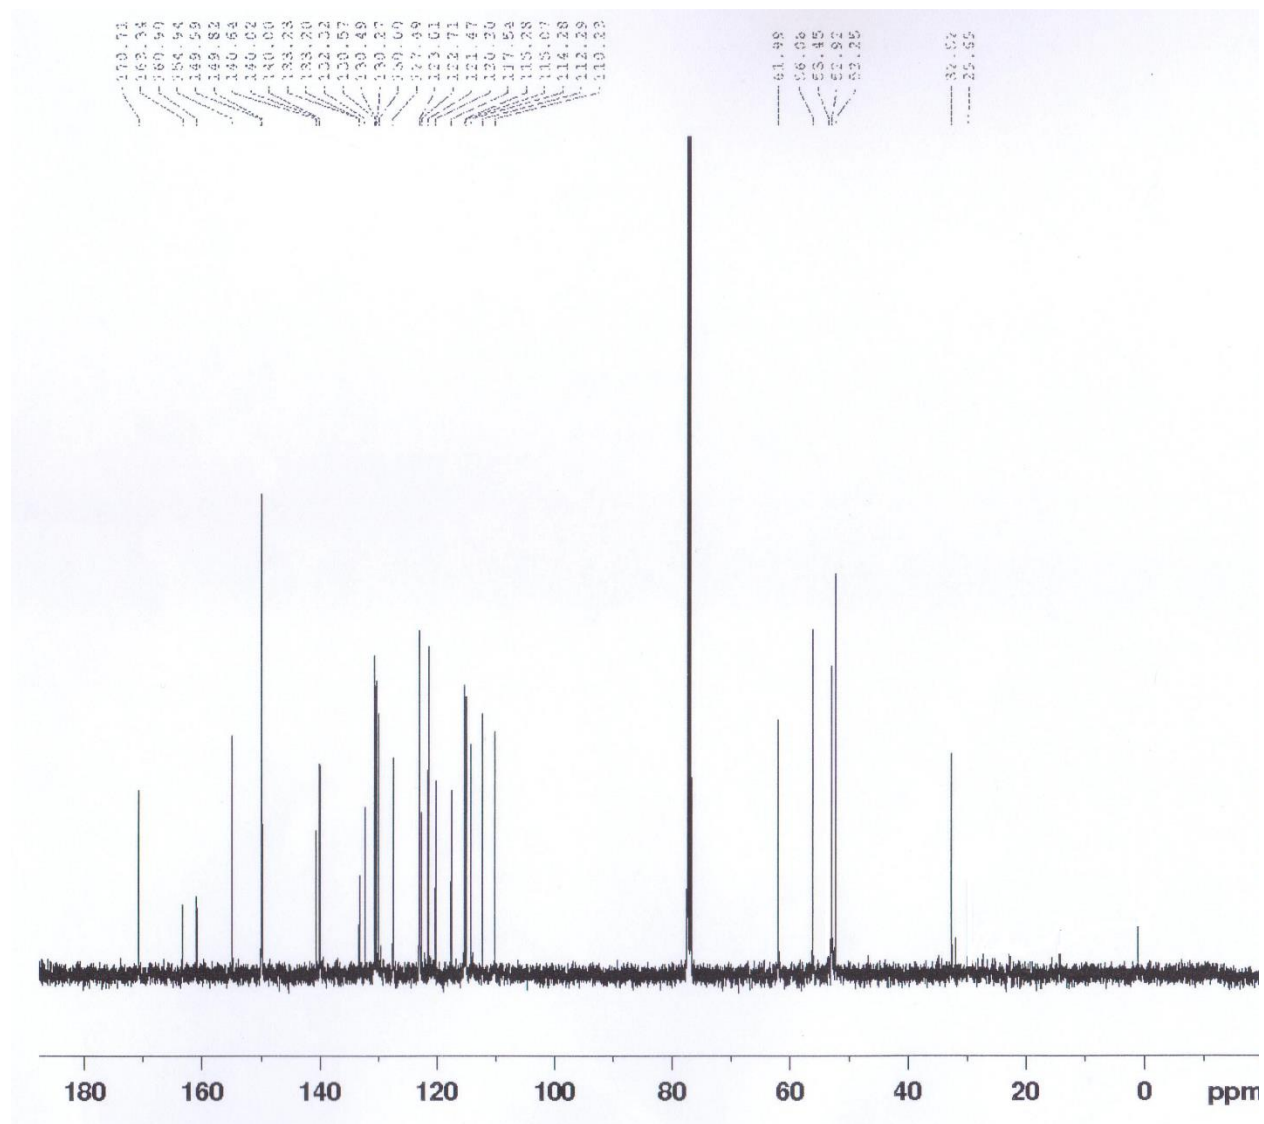

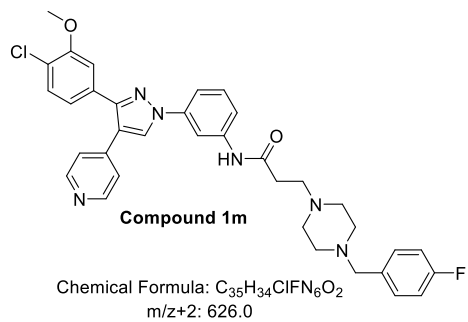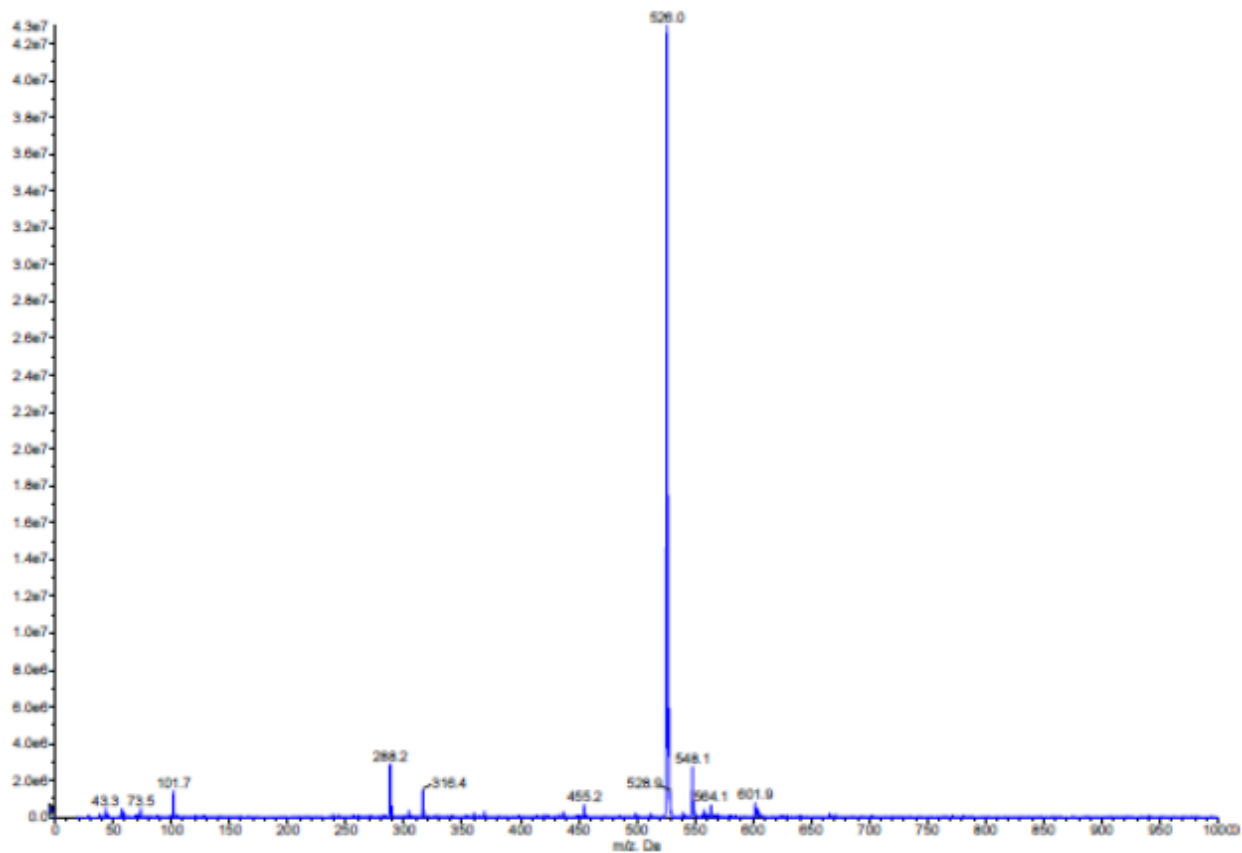

Supplement: IENZ_A_1653292_SM8370.pdf [file IENZ_A_1653292_SM8370.pdf]
